1 ***Adjudicating between face-coding models with***  
2 ***individual-face fMRI responses***

3 Short title: Adjudicating between face-coding models with fMRI

4

5 Johan D. Carlin\* & Nikolaus Kriegeskorte

6

7 \* to whom correspondence should be addressed:

8 Johan D. Carlin

9 MRC Cognition and Brain Sciences Unit

10 15 Chaucer Road

11 Cambridge CB2 7EF

12 UK

13 [johan.carlin@mrc-cbu.cam.ac.uk](mailto:johan.carlin@mrc-cbu.cam.ac.uk)

14 +44 (0) 1223 355294

15

16 Revised manuscript submitted to PLoS Computational Biology on 13 January 2017.

17

18 **PRE-PUBLICATION MANUSCRIPT**

19 ***Abstract***

20       The perceptual representation of individual faces is often explained with reference  
21 to a norm-based face space. In such spaces, individuals are encoded as vectors where  
22 identity is primarily conveyed by direction and distinctiveness by eccentricity. Here we  
23 measured human fMRI responses and psychophysical similarity judgments of individual  
24 face exemplars, which were generated as realistic 3D animations using a computer-  
25 graphics model. We developed and evaluated multiple neurobiologically plausible  
26 computational models, each of which predicts a representational distance matrix and a  
27 regional-mean activation profile for 24 face stimuli. In the fusiform face area, a face-  
28 space coding model with sigmoidal ramp tuning provided a better account of the data  
29 than one based on exemplar tuning. However, an image-processing model with  
30 weighted banks of Gabor filters performed similarly. Accounting for the data required  
31 the inclusion of a measurement-level population averaging mechanism that  
32 approximates how fMRI voxels locally average distinct neuronal tunings. Our study  
33 demonstrates the importance of comparing multiple models and of modeling the  
34 measurement process in computational neuroimaging.

## 35 ***Author Summary***

36 Humans recognize conspecifics by their faces. Understanding how faces are  
37 recognized is an open computational problem with relevance to theories of perception,  
38 social cognition, and the engineering of computer vision systems. Here we measured  
39 brain activity with functional MRI while human participants viewed individual faces. We  
40 developed multiple computational models inspired by known response preferences of  
41 single neurons in the primate visual cortex. We then compared these neuronal models to  
42 patterns of brain activity corresponding to individual faces. The data were consistent  
43 with a model where neurons respond to directions in a high-dimensional space of faces.  
44 It also proved essential to model how functional MRI voxels locally average the  
45 responses of tens of thousands of neurons. The study highlights the challenges in  
46 adjudicating between alternative computational theories of visual information  
47 processing.

## 48 ***Introduction***

49 Humans are expert at recognizing individual faces, but the mechanisms that support  
50 this ability are poorly understood. Multiple areas in human occipital and temporal  
51 cortex exhibit representations that distinguish individual faces, as indicated by  
52 successful decoding of face identity from functional MRI (fMRI) response patterns (1–  
53 10). Decoding can reveal the presence of face-identity information as well as  
54 invariances. However, the nature of these representations remains obscure because  
55 individual faces differ along many stimulus dimensions, each of which could plausibly  
56 support decoding. To understand the representational space, we need to formulate  
57 models of how individual faces might be encoded and test these models with responses  
58 to sufficiently large sets of face exemplars. Here we use representational similarity  
59 analysis (RSA) (11) to test face-coding models at the level of the representational  
60 distance matrices they predict. Comparing models to data in the common currency of  
61 the distance matrix enables us to pool the evidence over many voxels within a region,  
62 obviating the need to fit models separately to noisy individual fMRI voxels.

63 Many cognitive and neuroscientific models of face processing do not make  
64 quantitative predictions about the representation of particular faces (12,13). However,  
65 such predictions can be obtained from models based on the notion that faces are  
66 encoded as vectors in a space (14). Most face-space implementations apply principal  
67 components analysis (PCA) to face images or laser scans in order to obtain a space,  
68 where each component is a dimension and the average face for the training sample is  
69 located at the origin (15,16). In such PCA face spaces, eccentricity is associated with  
70 judgments of distinctiveness, while vector direction is associated with perceived  
71 identity (17–19). Initial evidence from macaque single-unit recordings and human fMRI  
72 suggests that brain responses to faces are strongly modulated by face-space eccentricity,  
73 with most studies finding increasing responses with distinctiveness (20–23). However,

74 there has been no attempt to develop a unified account for how a single underlying face-  
75 space representation can support both sensitivity to face-space direction at the level of  
76 multivariate response patterns and sensitivity to eccentricity at the level of regional-  
77 mean fMRI activations. Here we develop and evaluate several face-space coding models,  
78 which differ with respect to the proposed shape of the neuronal tuning functions across  
79 face space and with respect to the distribution of preferred face-space locations over the  
80 simulated neuronal population.

81 Face-space coding models define high-level representational spaces, which are  
82 assumed to arise through unspecified low-level featural processing. An alternative  
83 possibility is that some cortical face-space representations can be explained directly by  
84 low-level visual features, which typically covary with position in PCA-derived face  
85 spaces. To explore this possibility, we evaluated a Gabor-filter model, which receives  
86 stimulus images rather than face-space coordinates as input, and has previously been  
87 used to model response preferences of individual voxels in early visual cortex (24).

88 We found that cortical face responses measured with fMRI strongly reflect face-  
89 space eccentricity: a step along the radial axis in face space results in a much larger  
90 pattern change than an equal step along the tangential axis. These effects were  
91 consistent with either a sigmoidal-ramp-tuning or a Gabor-filter model. The  
92 performance of these winning models depended on the inclusion of a measurement-  
93 level population-averaging mechanism, which accounted for local averaging of neuronal  
94 tunings in fMRI voxel measurements.

## 95 **Results**

### 96 ***Sampling face space with photorealistic but physically-controlled*** 97 ***animations***

98 In order to elicit strong percepts of the 3D shape of each individual face, we  
99 generated a set of photorealistic animations of face exemplars. Each 2s animation in the  
100 main experiment featured a face exemplar in left or right half profile, which rotated  
101 outward continuously (S2 Movie, Experimental Procedures). The animations were  
102 based on a PCA model of 3D face shape and texture (25). Each frame of each animation  
103 was cropped with a feathered aperture and processed to equate low-level image  
104 properties across the stimulus set (Experimental Procedures). We generated 12 faces  
105 from a slice through face space (Figure 1b). Euclidean distances between the Cartesian  
106 coordinates for each face were summarized in a distance matrix (Figure 1a), which  
107 served as the reference for comparisons against distances in the perceptual and cortical  
108 face spaces (Figure 1c-h). We generated a physically distinct stimulus set with the same  
109 underlying similarity structure for each participant by randomizing the orientation of  
110 the slice through the high-dimensional PCA space (for examples, see S1 Figure). This  
111 served to improve generalizability by ensuring that group-level effects were not  
112 strongly influenced by idiosyncrasies of face exemplars drawn from a particular face-  
113 space slice. In formal terms, group-level inference therefore treats stimulus as a random  
114 effect (26).

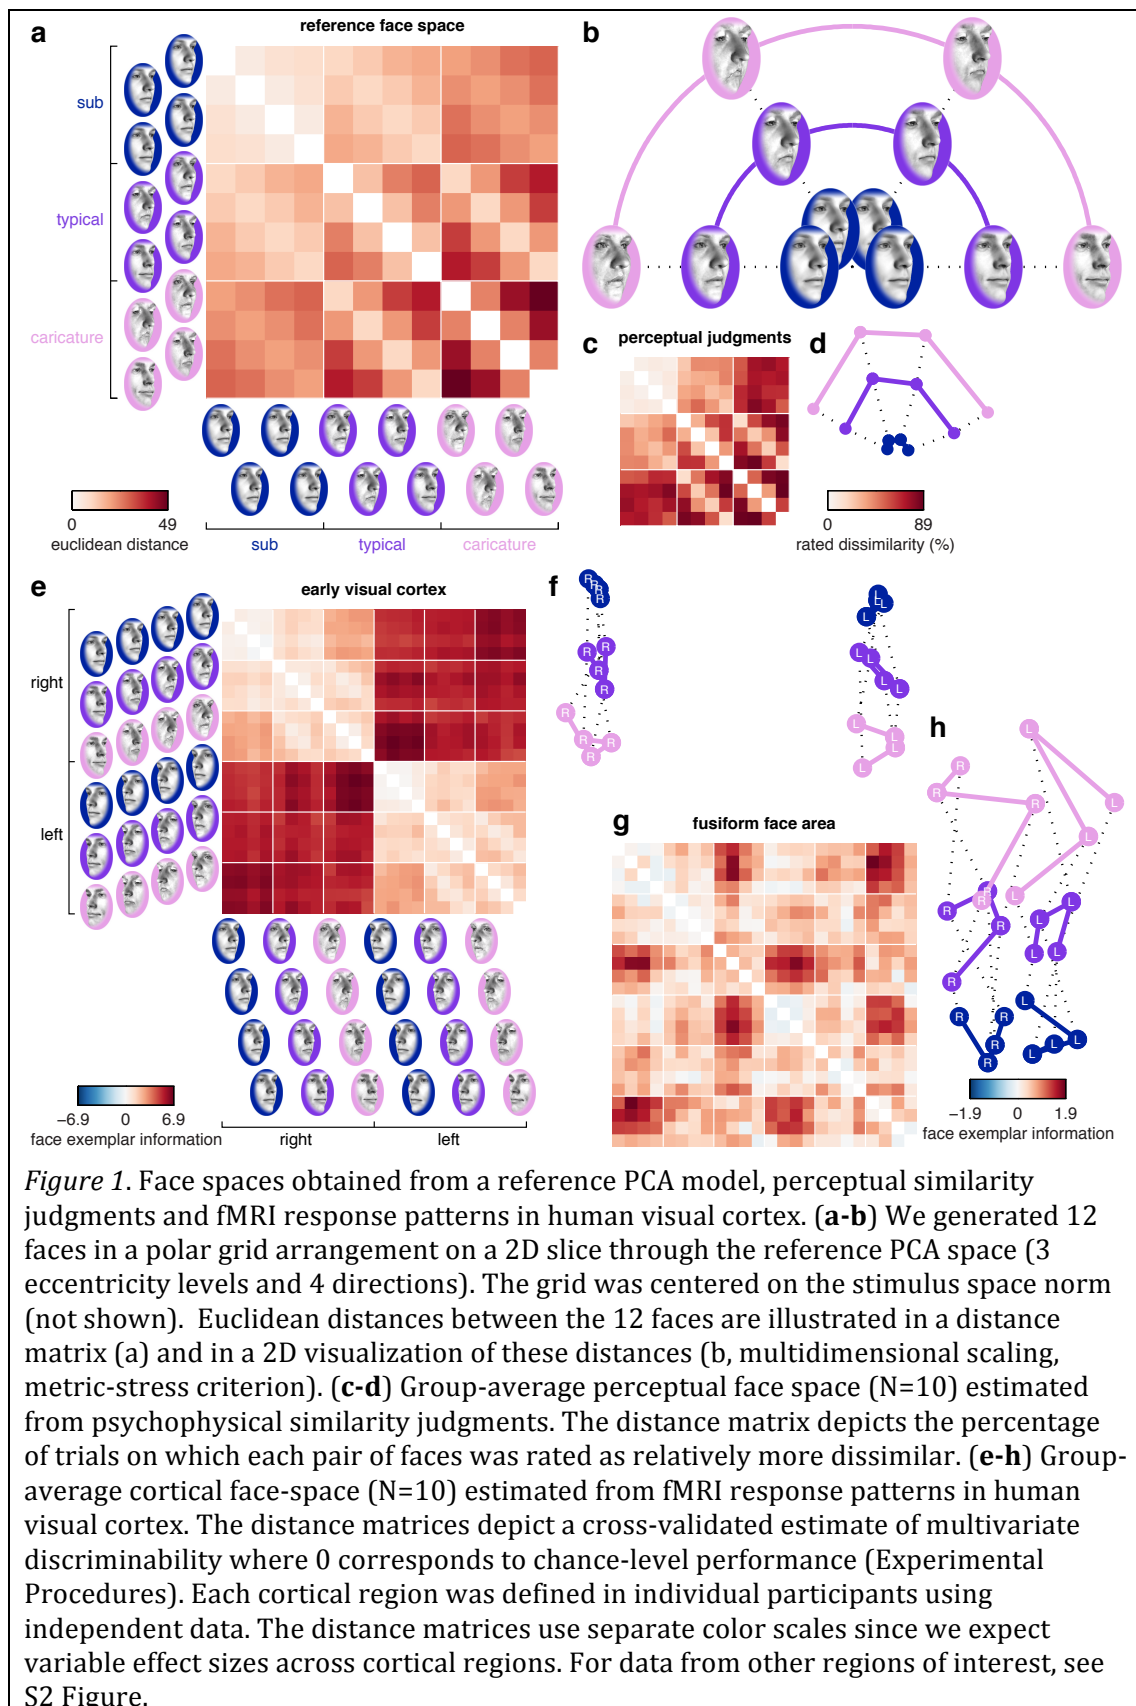

## 115 ***Cortical face spaces are warped relative to the reference PCA space***

116 Human participants (N=10) participated in a perceptual judgment task (S1 Movie,  
117 2145 trials over 4 sessions) followed by fMRI scans (S2 Movie, 2496 trials over 4  
118 recording days). Brain responses were analyzed separately in multiple independently  
119 localized visual regions of interest. We compared representational distance matrices  
120 estimated from these data sources to distances predicted according to different models  
121 using the Pearson correlation coefficient. These distance-matrix similarities were  
122 estimated in single participants and the resulting coefficients were Z-transformed and  
123 entered into a summary-statistic group analysis for random-effects inference  
124 generalizing across participants and stimuli (Experimental Procedures).

125 We observed a strong group-average correlation between distance matrices  
126 estimated from perceptual dissimilarity judgments and Euclidean distances in the  
127 reference PCA space (mean( $r$ )=0.83, mean( $Z(r)$ )=1.20, standard error=0.05,  $p<0.001$ ,  
128 Figure 1c, Figure 5a, S1 Table). Correlations between the reference PCA space and  
129 cortical face spaces were generally statistically significant, but smaller in magnitude  
130 (Figure 5b-c, S5 Figure, S1 Table). Distances estimated from the fusiform face area were  
131 weakly, but highly significantly correlated with the reference PCA space (mean( $r$ )=0.17,  
132 mean( $Z(r)$ )=0.17, standard error=0.04,  $p<0.001$ , Figure 5c). Distances estimated from  
133 the early visual cortex were even less, though still significantly, correlated with the  
134 reference PCA space (mean( $r$ )=0.07, mean( $Z(r)$ )=0.07, standard error=0.04,  $p=0.044$ ,  
135 Figure 5b). These smaller correlations in cortical compared to perceptual face spaces  
136 could not be attributed solely to lower functional contrast-to-noise ratios in fMRI data,  
137 because the effects generally did not approach the noise-ceiling estimate for the sample  
138 (shaded region in Figure 5). The noise ceiling was based on the reproducibility of  
139 distance matrices between participants (Experimental Procedures). Instead, these  
140 findings indicate that the reference PCA space could not capture all the explainable  
141 dissimilarity variance in cortical face spaces.



## 142 ***Cortical face spaces over-represent eccentricity***

143 We quantified the apparent warps in the cortical face spaces by constructing a  
144 multiple-regression RSA model, with separate distance-matrix predictors for  
145 eccentricity and direction, and for within and across face viewpoints (Figure 2a,  
146 Experimental Procedures). These predictors were scaled such that differences between  
147 the eccentricity and direction parameters could be interpreted as warping relative to a  
148 veridical encoding of distances in the reference PCA face space. We also observed strong  
149 viewpoint effects in multiple regions, including the early visual cortex (Figure 1e-f).  
150 Such effects were modeled by separate constant terms for distances within and across  
151 viewpoint.

152 Eccentricity changes had a consistently greater effect on representational patterns  
153 than direction changes, suggesting that a step change along the radial axis resulted in a  
154 larger pattern change than an equivalent step along the tangential axis (Figure 2c-d).  
155 The overrepresentation of eccentricity relative to direction was observed in each  
156 participant, and in both cortical and perceptual face spaces, although the effect was  
157 considerably larger in cortical face spaces. A repeated-measures two-factor ANOVA  
158 (eccentricity versus direction, within versus across viewpoint) on the single-participant  
159 parameter estimates from the multiple-regression RSA model was consistent with these  
160 apparent differences, with a statistically significant main effect of eccentricity versus  
161 direction for perceptual and cortical face spaces (all  $p < 0.012$ , S2 Table). Thus, compared  
162 to the encoding in the reference PCA space, cortical face spaces over-represented the  
163 radial, distinctiveness-related axis compared to the tangential, identity-related axis.

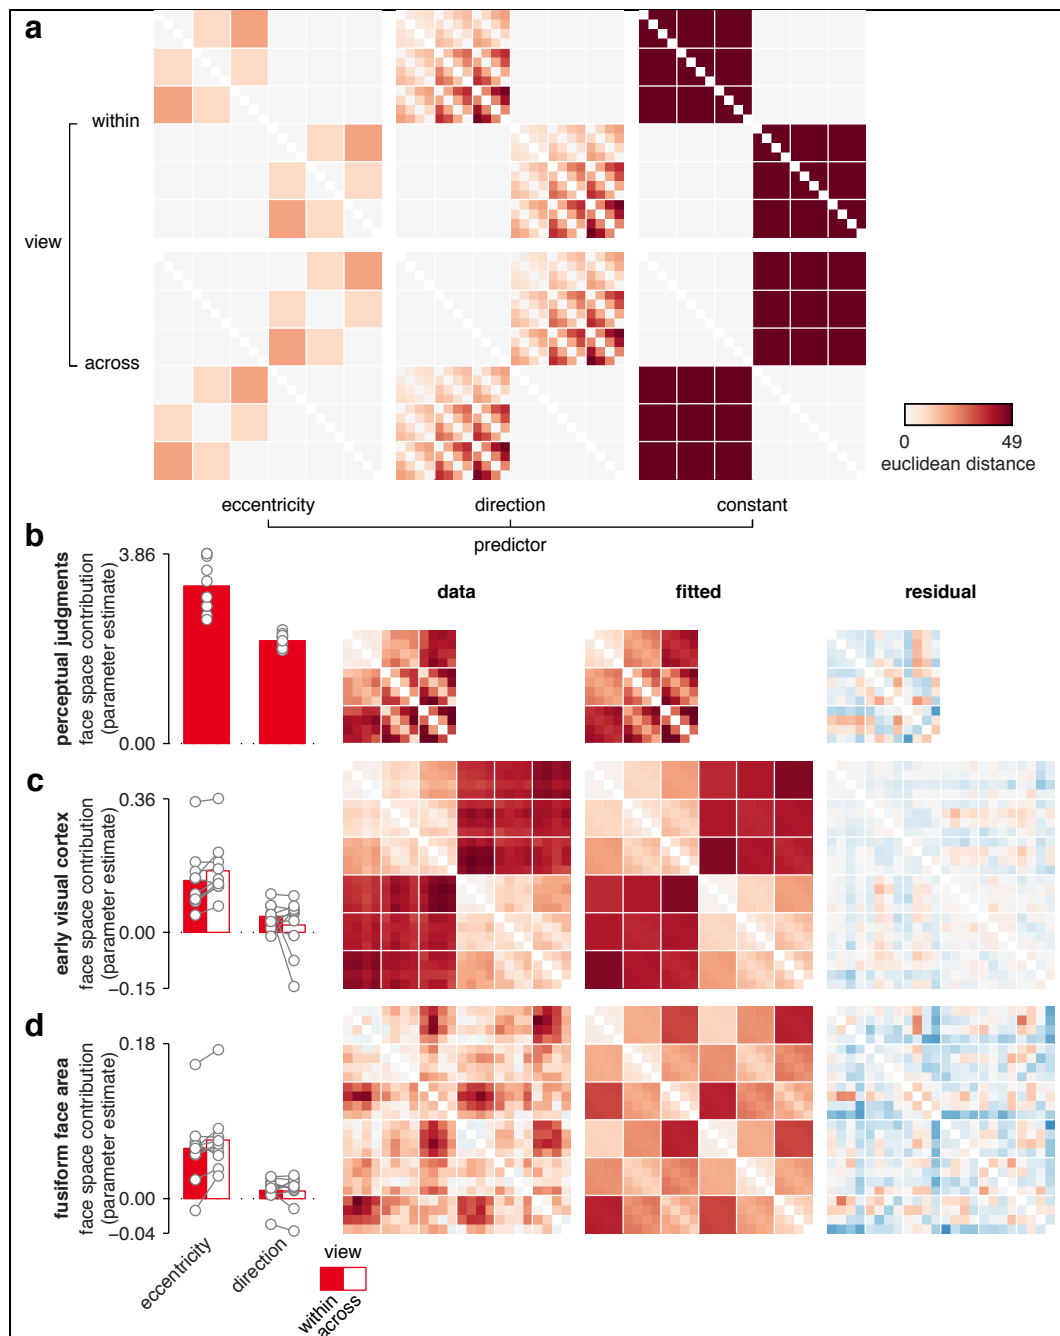

**Figure 2.** Face-space warping reflects an over-representation of eccentricity over direction information. **(a)** Squared distances in the reference PCA space were parameterized into predictors coding all 4 combinations of face-space metric (direction, eccentricity) and viewpoint (within, across). This multiple regression RSA model also included separate constant terms for each viewpoint, and was fitted separately to each face space using ordinary least squares (Experimental Procedures). Importantly, the scaling of the eccentricity and direction predictors ensures that equal parameter estimates corresponds to a preserved reference PCA space. **(b)** Multiple regression fit to the perceptual face space with group-average parameter estimates, distance matrix, fitted distances and residuals. Gray lines reflect single participant parameter estimates **(c-d)** Multiple regression fit to the cortical face spaces, plotted as in b. See S2 Table for inferential statistics.

165        Although these findings suggest a larger contribution of face-space eccentricity than  
166        direction in visual cortex, we also observed clear evidence for greater-than-chance  
167        discrimination performance among faces that differed only in face-space direction.  
168        Group-average cross-validated discriminant distances for faces that differed in direction  
169        but not eccentricity exceeded chance-level performance ( $p < 0.05$ ) for typical and  
170        caricatured faces in both the early visual cortex and the fusiform face area (S3 Figure).  
171        Sub-caricatured faces were less consistently discriminable. Indeed, direction  
172        discrimination increased with eccentricity both within (mean=0.013, standard  
173        error=0.007,  $p=0.036$ ) and across (mean=0.012, standard error=0.005,  $p=0.016$ )  
174        viewpoint in the fusiform face area (linear effect of sub>typical>caricature), suggesting  
175        that direction discrimination increased with face-space eccentricity in a dose-dependent  
176        manner (S3 Table). By contrast, within viewpoint discrimination performance in the  
177        early visual cortex scaled with eccentricity (mean=0.039, standard error=0.008,  
178         $p < 0.001$ ), but distances that spanned a viewpoint change did not vary with eccentricity  
179        (mean=0.009, standard error=0.019,  $p=0.297$ ). This is consistent with a view-dependent  
180        representation in early visual cortex. Thus, cortical regions discriminate identity-related  
181        direction information even in the absence of a difference in distinctiveness-related  
182        eccentricity information, suggesting that cortical face representations cannot be  
183        reduced to a one-dimensional code based on distinctiveness alone. In summary, cortical  
184        coding of face-space position is systematically warped relative to the reference PCA  
185        space, with a substantial overrepresentation of eccentricity and a smaller, but reliable  
186        contribution of face-space direction.

187 ***Regional-mean fMRI activation increases with face-space eccentricity,***  
188 ***but removing such effects does not substantially alter cortical face-***  
189 ***space warping***

190 Cortical face-space warping could not be explained by regional-mean activation  
191 preferences for caricatures. We performed a regional-mean analysis of responses in  
192 each cortical area, which confirmed previous reports that fMRI responses increase with  
193 distinctiveness across much of visual cortex (Figure 6, S6 Figure) (23). In order to test  
194 the influence of such regional-mean activation effects on representational distances, we  
195 adapted our discriminant distance metric to remove additive and multiplicative overall  
196 activation effects (Experimental Procedures). Distance matrices estimated using this  
197 alternative method were highly similar to ones estimated without removal of overall  
198 activation effects (all  $r=0.9$  or greater for the Pearson correlation between group-  
199 average distance matrices with and without mean removal, S4 Figure). Thus, although  
200 eccentricity affected the overall activation in all visual areas, the warping of the cortical  
201 face spaces could not be attributed to overall activation effects alone.

202 ***Accounting for cortical and perceptual face spaces with PCA face-***  
203 ***space-tuning models and image-computable models***

204 We developed multiple computational models, each of which predicts a  
205 representational distance matrix and a regional-mean activation profile. These models  
206 can be divided into three classes: the sigmoidal-ramp tuning and exemplar tuning  
207 models receive face-space coordinates as input, while the Gabor-filter model receives  
208 gray-scale pixel intensities from the stimulus images as input. We evaluated each of  
209 these three model classes with and without a measurement-level population-averaging  
210 mechanism, which approximates how fMRI voxels locally average underlying neural  
211 activity.

212 The sigmoidal-ramp-tuning model proposes that the representational space is  
213 covered with randomly oriented ramps, each of which exhibits a monotonically  
214 increasing response along its preferred direction in face space (Figure 3a). This model is  
215 inspired by known preferences for extreme feature values in single units recorded from  
216 area V4 and from face-selective patches in the macaque visual cortex (20,27,28). We  
217 modeled the response along each model neuron's preferred direction using a sigmoidal  
218 function with two free parameters, which control the horizontal offset and the  
219 saturation of the response function (Experimental Procedures). A third parameter  
220 controlled the strength of measurement-level population averaging by translating each  
221 individual model unit's response toward the population-mean response. The way this  
222 accounts for local averaging by voxels is illustrated for the fusiform face area in Figure  
223 3a-b. It can be seen that measurement-level population averaging introduces a  
224 substantial U-shape in the individual response functions, with only a minor deflection in  
225 favor of a preferred face-space direction. At the level of Euclidean distances between  
226 population response vectors evoked by each face, this leads to exaggerated distances for  
227 radial relative to tangential face differences (Figure 3c). In summary, measurement-level  
228 population averaging provides a simple means to interpolate between two extreme  
229 cases: A value of 0 corresponds to the case where the model's response is perfectly  
230 preserved in the fMRI voxels, whereas a value of 1 corresponds to the case where the  
231 model's response to a given stimulus is reduced to the arithmetic mean over the model  
232 units.

233 In the exemplar model, each unit prefers a location in face space, rather than a  
234 direction, and its tuning is described by a Gaussian centered on the preferred location.  
235 The representational space is covered by a population of units whose preferred  
236 locations are sampled from a Gaussian centered on the norm face (Figure 3d,  
237 Experimental Procedures). We fitted the Gaussian exemplar-tuning model similarly to  
238 the sigmoidal ramp-tuning model, using two parameters that controlled the width of the

239 Gaussian tuning function and the width of the Gaussian distribution from which  
 240 preferred faces were sampled. We also evaluated a variant of the exemplar model where  
 241 the distribution of preferred faces followed an inverted-Gaussian distribution (Figure  
 242 3e). Population averaging was modeled in the same way as for the sigmoidal-ramp-  
 243 tuning model using a third parameter.

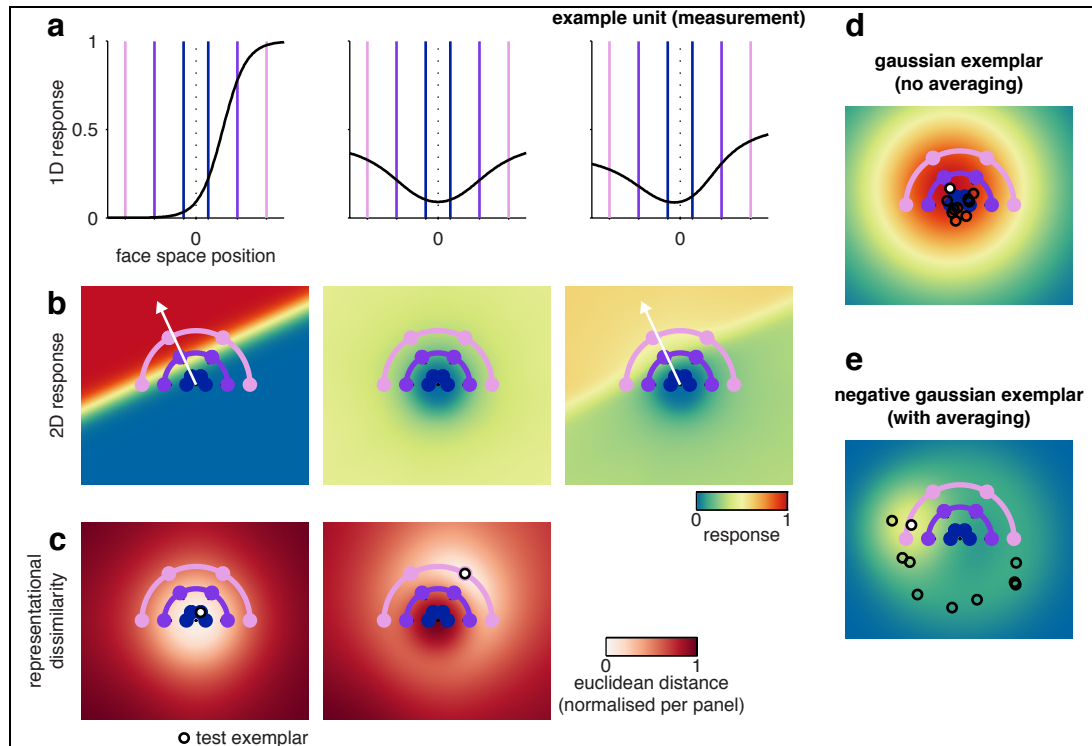

**Figure 3.** Computational models for face-space coding based on sigmoidal ramp or exemplar tuning coupled with measurement-level population averaging. The visualization uses the model parameters that were optimal for predicting the face space in the fusiform face area. **(a)** Response function from the sigmoidal ramp model's internal representation (left panel) and its measurement (right panel) following translation toward the population-average response function (middle panel). **(b)** Two-dimensional generalization of the sigmoidal ramp tuning function to encode a direction in the face-space slice. An example unit is plotted in the left and right panels with the population-average response in the middle panel. **(c)** The model's representational dissimilarity structure was estimated as the Euclidean distance between the population response vectors elicited by a coordinate in the face-space slice (white circle) and every other coordinate on the face space slice. Two example coordinates are plotted in the left and right panels. It can be seen that dissimilarity increases more rapidly with radial (eccentricity) than with tangential (direction) face-space distance. **(d)** Two-dimensional response function for an example unit from the Gaussian exemplar model (white marker). A sub-set of other units is overlaid in black markers to illustrate the width of the Gaussian distribution of tuning centers. **(e)** Two-dimensional response function for an example unit from the negative Gaussian exemplar model, plotted as in panel d.

244

245       The Gabor-filter model differs from the previous model classes in that it receives  
246       gray-scale image intensities as input, rather than face-space position (Figure 4a). Such  
247       models have previously been used to account for response preferences of individual  
248       voxels in early visual cortex (24). The model comprises Gabor filters varying in  
249       orientation, spatial frequency and phase, and spatial position. The filters are organized  
250       into banks, each corresponding to a spatial frequency and comprising a different  
251       number of spatial positions (coarser for lower spatial frequencies; Figure 4b,  
252       Experimental Procedures). We assumed that all orientations and spatial positions are  
253       equally represented. For the spatial frequencies, however, we let the data determine the  
254       weighting. We fitted a weighted representational model with one weight for each  
255       spatial-frequency bank (5 free parameters, Figure 4c). Local averaging in fMRI voxels  
256       was modeled using two stages of measurement-level population averaging: First, filters  
257       with tuning centers on either side of the vertical meridian were translated separately  
258       toward their respective hemifield-specific population averages. Second, a global-pool  
259       averaging was performed similarly to the other models. The contribution of these two  
260       population-average signals to the measured responses was modeled by 2 additional  
261       parameters (Figure 4d). The additional hemifield-specific averaging stage was necessary  
262       to account for strong view-specific effects in early visual cortex, but did not materially  
263       contribute to the fit in ventral temporal regions.

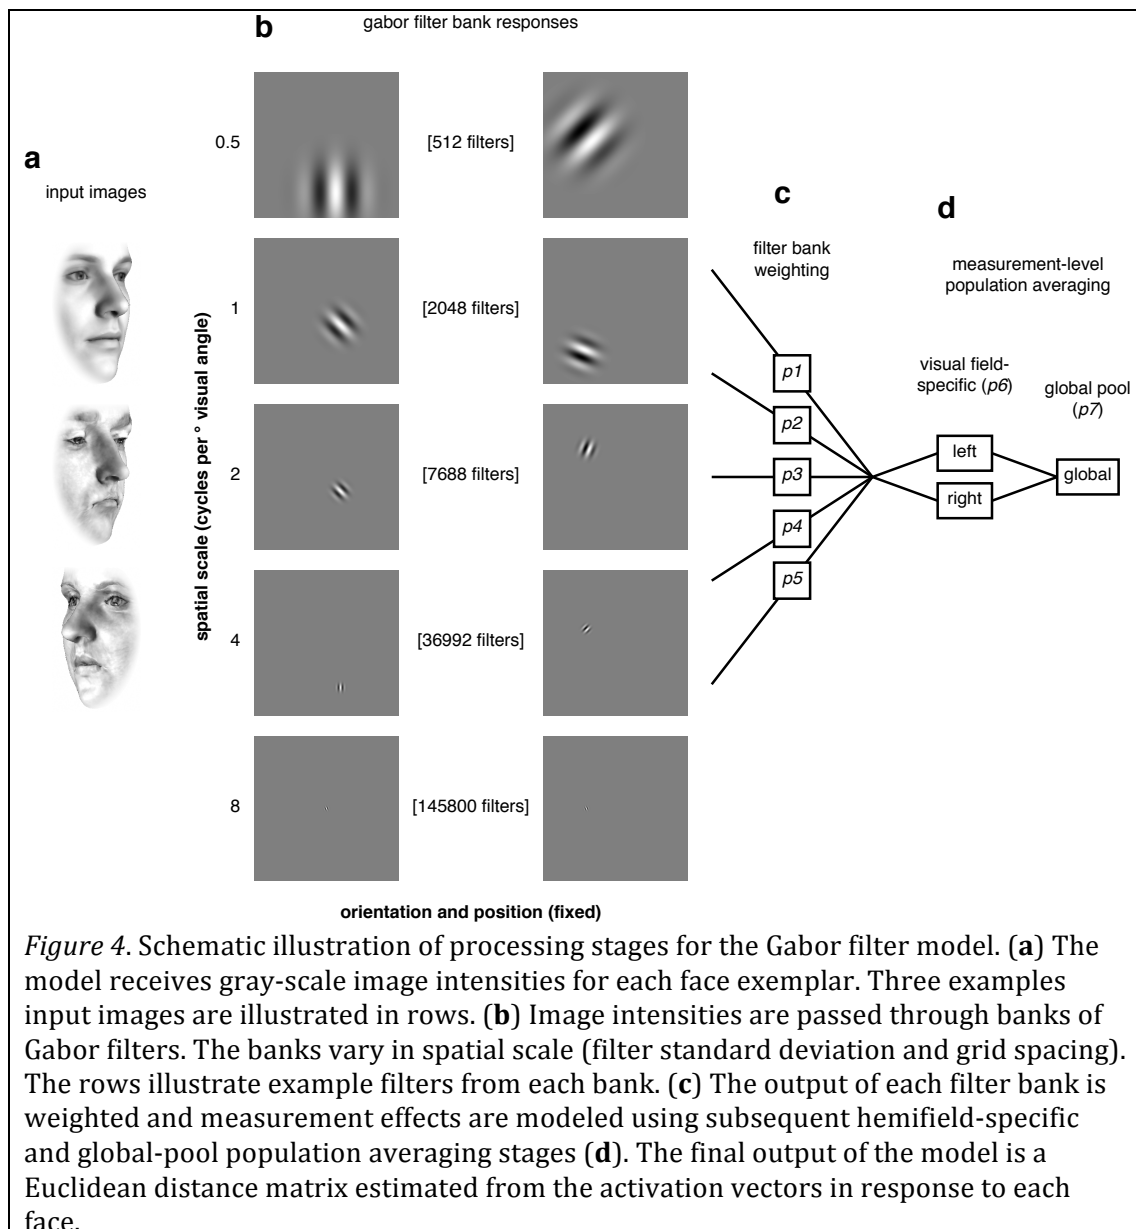

264

## 265 ***Multiple models can explain cortical and perceptual face spaces***

266 We fitted each of the computational models so as to best predict the

267 representational distance matrices from cortical regions and perceptual judgments. We

268 used a leave-one-participant-out cross-validation approach, in which model

269 performance was evaluated on participants and face identities not used in fitting the

270 parameters (Experimental Procedures). Model performance was summarized as the

271 Fisher-Z-transformed Pearson correlation coefficient between the model distances and

272 the data distances. We performed statistical inference on the average Fisher-Z-



273 transformed correlations over all train-test splits of the data using t tests. Our cross-  
274 validation scheme tests for generalization across participants and face identities and  
275 ensures that models that differ in complexity (number of free parameters) can be  
276 compared. In order to investigate the effect of local averaging in fMRI voxels on  
277 representational similarity, we fitted two variants of each model: the full model and a  
278 variant that excluded measurement-level population averaging.

279 We found that all evaluated models explained almost all the explainable variance for  
280 the perceptual face space (Figure 5a), with only negligible differences in cross-validated  
281 generalization performance (for all pairwise model comparisons, see S4 Table). The  
282 inclusion of measurement-level population averaging had little effect on performance.  
283 This is expected because perceptual judgments, unlike fMRI voxels, are not affected by  
284 local averaging across representational units. Thus, the behavioral data was ambiguous  
285 with regard to the proposed models, which motivates model selection by comparison to  
286 the functional imaging data.

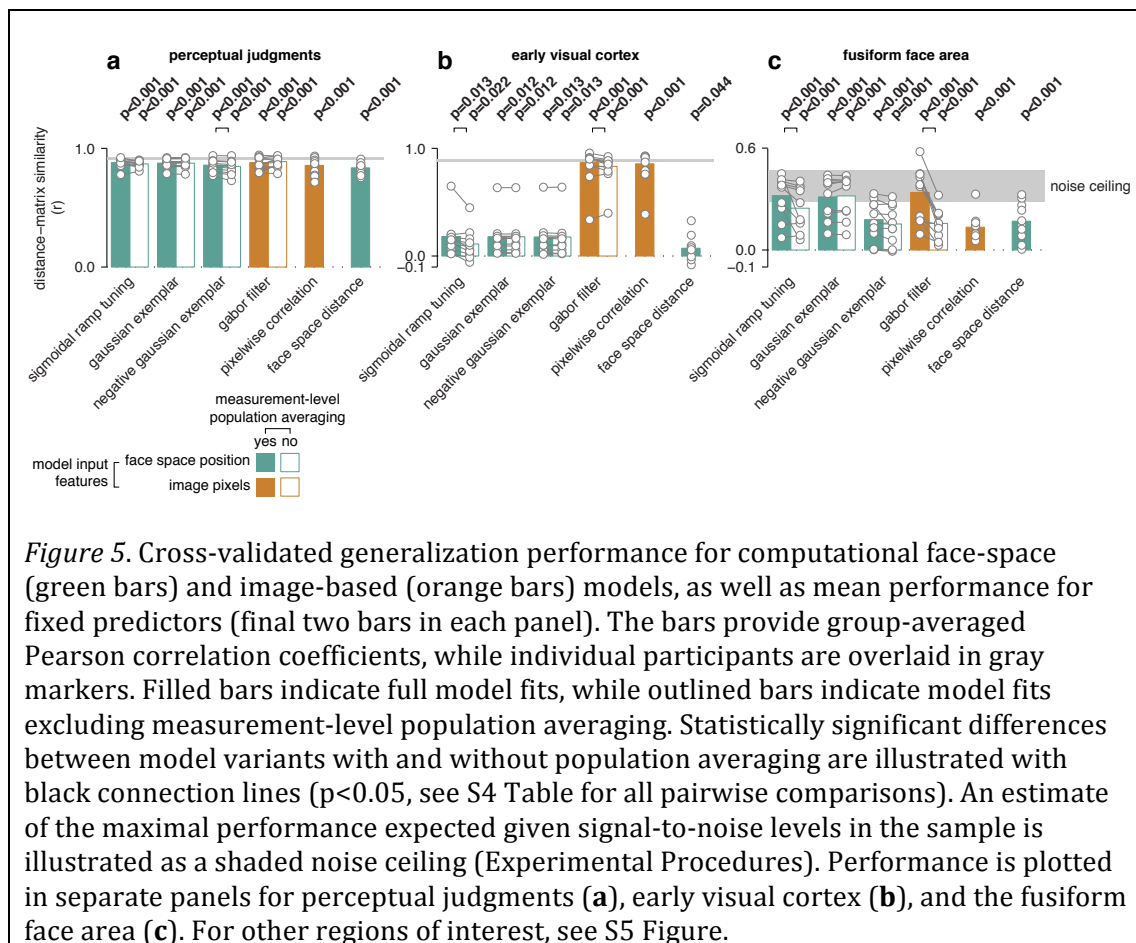

287

288 Unlike the perceptual judgments data, the cortical face spaces exhibited substantial  
 289 differences between the model fits, with a robust advantage for measurement-level  
 290 population averaging in most cases. In the following, we focus on generalization  
 291 performance for fits to the early visual cortex and the fusiform face area (for fits to other  
 292 regions, see S5 Figure).

293 The early visual cortex was best explained by the Gabor-filter model, which beat the  
 294 alternative computational models ( $p < 0.001$  for all pairwise model comparisons, S4  
 295 Table) and came close to explaining all explainable variance given noise levels in the  
 296 data. Generalization performance for this model was slightly, but significantly better  
 297 ( $p = 0.009$ , Figure 5b) when population averaging was enabled. As a control, we also  
 298 tested raw pixel intensities as the representational units. We found no significant

299 difference in performance between the 0-parameter pixel-intensity model and the fitted  
300 Gabor-filter model with population averaging ( $p=0.380$ ).

301 The fusiform face area was also well explained by the Gabor-filter model, but in this  
302 region we observed similar performance for the sigmoidal-ramp-tuning model. Both  
303 models, with population averaging, reached the lower bound of the noise ceiling  
304 (Experimental Procedures; Figure 5c, S4 Table), suggesting that these models were able  
305 to explain the variance in the dataset that was consistent between participants.  
306 Measurement-level population averaging improved generalization performance in the  
307 fusiform face area for both the Gabor-filter ( $p<0.001$ ) and sigmoidal-ramp-tuning  
308 models ( $p=0.032$ ), but did not improve either of the exemplar models ( $p=0.263$  for  
309 Gaussian exemplar,  $p=0.096$  for negative Gaussian exemplar). In summary, the  
310 representation in the fusiform face area could be explained by multiple models, and in  
311 most cases measurement-level population averaging improved the quality of the fit.

312 ***Regional-mean activation profiles are consistent with sigmoidal-ramp***  
313 ***and Gabor-filter, but not Gaussian-exemplar models***

314 Multiple computational models provided qualitatively similar fits to our cortical data  
315 at the distance-matrix level. However, we might still be able to adjudicate between them  
316 at the level of regional-mean activation profiles. To this end, we obtained activation-  
317 profile predictions from each model by averaging over all model units. We then  
318 correlated the predicted population-mean activation profile with the regional-mean  
319 fMRI activation profile for each participant. Even though these models were fitted to  
320 distance matrices rather than to regional-mean fMRI responses, we found that they  
321 exhibited systematic population-mean response preferences as a function of face-space  
322 eccentricity (Figure 6, for other regions see S6 Figure). In particular, the sigmoidal-ramp  
323 and Gabor-filter models both predicted increasing population-mean responses with  
324 face-space eccentricity, while the Gaussian-exemplar model predicted decreasing

325 responses with eccentricity (S5 Table, S6 Table for pairwise comparisons). This  
326 constitutes evidence against the Gaussian-exemplar model, under the assumption that  
327 neuronal activity is positively associated with regional-mean fMRI response in visual  
328 regions (29–33). The preference for faces closer to the face-space origin (sub-  
329 caricatures) in the Gaussian-exemplar model arises as a necessary consequence of the  
330 Gaussian distribution of preferred faces, which is centered on the average face. We also  
331 tested a Gaussian exemplar-tuning model with an inverted Gaussian distribution of  
332 preferred faces. In this model, more units prefer faces far from the norm (caricatures)  
333 than faces close to the norm (sub-caricatures). However, the inverted-Gaussian  
334 exemplar model's generalization performance was considerably worse than the  
335 standard-Gaussian exemplar model's (Figure 5).

336 In summary, exemplar models accurately predicted representational distances for  
337 cortical face spaces when the preferred-face distribution was Gaussian, but such  
338 distributions led to inaccurate predictions of regional-mean fMRI activation profiles.  
339 Thus, analysis of regional-mean fMRI responses enabled us to adjudicate between  
340 models that made similar predictions at the distance-matrix level, and specifically  
341 indicated that the Gaussian exemplar model is unlikely to be the correct model for  
342 cortical face-space representation, despite a good fit at the distance-matrix level.

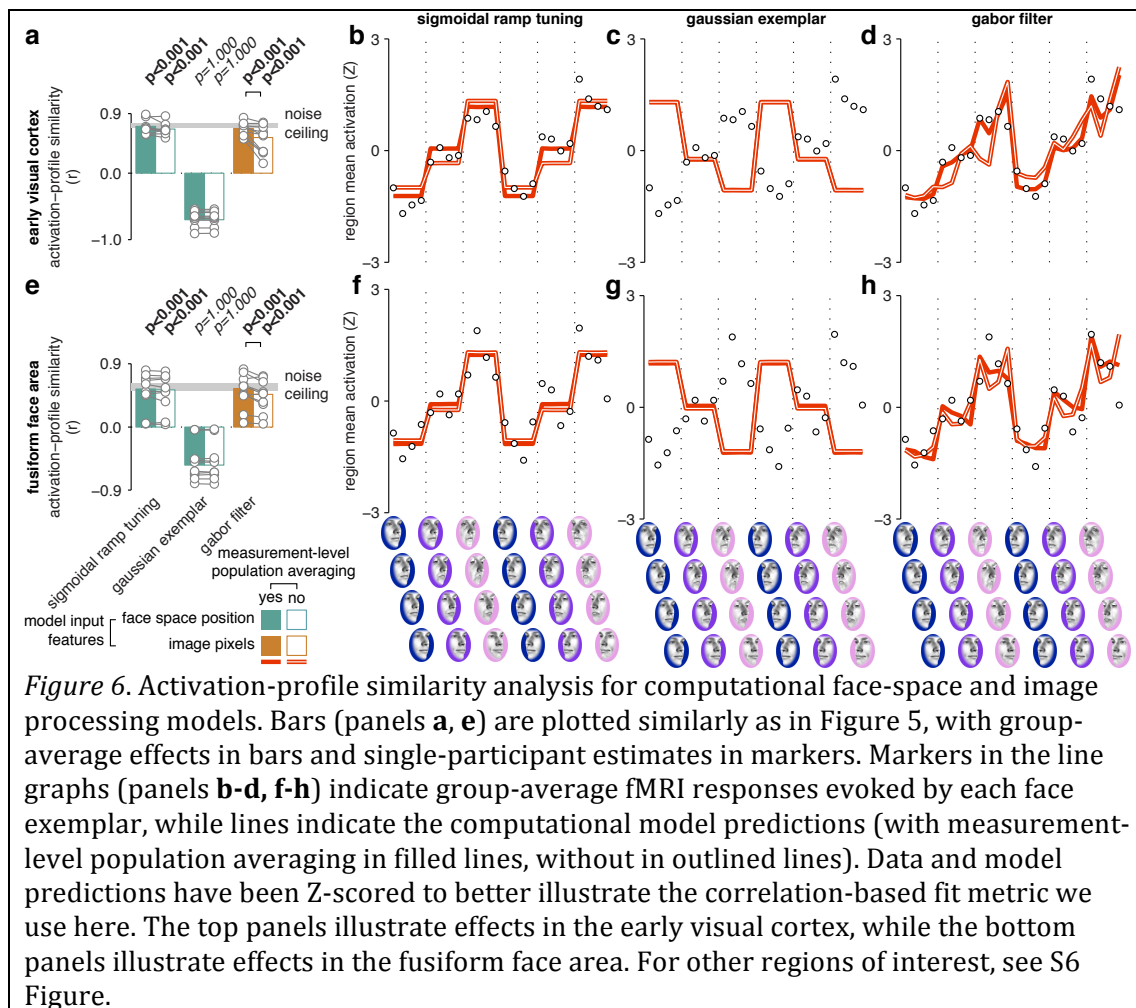

343

344 ***Measurement-level population averaging is necessary to account for***  
 345 ***symmetric-view tolerance and over-representation of eccentricity***

346 We found that models that included measurement-level population averaging  
 347 generally outperformed models that did not. This advantage appeared to originate in  
 348 how models with population averaging captured two effects in the cortical face spaces:  
 349 symmetric view-tolerance and over-representation of face-space eccentricity relative to  
 350 direction.

351 First, population averaging enabled the image-based Gabor-filter model to exhibit  
 352 symmetric-view-tolerant responses to the face exemplars. Two mirror-symmetric views  
 353 will drive a mirror symmetric set of Gabor features. Thus, while the pattern of activity

354 differs, the population-mean activity is similar. Measurement-level pooling over filters  
355 centered on distinct visual field locations therefore renders symmetric views more  
356 similar in the representation. For instance, the face space in the fusiform face area  
357 exhibited little sensitivity to viewpoint, and the Gabor-filter model fit to this region was  
358 greatly improved by the inclusion of measurement-level population averaging (Figure  
359 5c, S2 Figure). Indeed, with population averaging, generalization performance for the  
360 image-based Gabor-filter model was similar to the sigmoidal-ramp-tuning and exemplar  
361 models, for which view tolerance is assumed at the input stage. General view tolerance,  
362 beyond the symmetric views we used here, is computationally more challenging.  
363 However, for our stimulus set, it was not necessary to posit any intrinsic view-invariant  
364 computations in the fusiform face area to explain how its face spaces come to exhibit  
365 symmetric view tolerance.

366       Second, measurement-level population averaging increased the degree to which  
367 both the sigmoidal-ramp and the Gabor-filter model over-represented face-space  
368 eccentricity relative to direction, which improved the fit for multiple cortical regions. To  
369 isolate this smaller effect from the larger symmetric-view-tolerance effect, we collapsed  
370 viewpoint in the first-level single-participant fMRI linear model and re-estimated the  
371 cortical face spaces and all model fits for the resulting simplified 12-condition design  
372 matrix, where each predictor coded appearances of a given face identity regardless of its  
373 viewpoint (S7 Figure). Even after collapsing across viewpoints at the first level in this  
374 way, measurement-level population averaging still improved the generalization  
375 performance of the sigmoidal-ramp and the Gabor-filter model in nearly all cases  
376 ( $p < 0.05$ , see S7 Table for descriptive statistics and S8 Table for all pairwise  
377 comparisons), including the early visual cortex ( $p < 0.001$  for sigmoidal ramp tuning,  
378  $p = 0.004$  for Gabor filter) and the fusiform face area ( $p = 0.001$  for sigmoidal ramp tuning,  
379  $p = 0.007$  for Gabor filter). Thus, the advantage for measurement-level population  
380 averaging could not be accounted for by the fact that it helps explain symmetric view

381 tolerance. In sum, the addition of population averaging to the model improved model  
382 generalization performance, and this advantage appeared to originate in accounts for  
383 two distinct observed phenomena.

## 384 ***Discussion***

385        This study investigated human face processing by measuring how a face space of  
386 individual exemplars was encoded in visual cortical responses measured with fMRI and  
387 in perceptual judgments. Relative to a reference PCA model of the 3D shape and texture  
388 of faces, cortical face spaces from all targeted regions systematically over-represented  
389 eccentricity relative to direction (i.e., the radial relative to the tangential axis). Cortical  
390 regions varied in their sensitivity to face viewpoint. We fitted multiple computational  
391 models to the data. Considered collectively, the cortical face spaces in the fusiform face  
392 area were most consistent with a face-space-based sigmoidal-ramp-tuning model and an  
393 image-based Gabor-filter model, and less consistent with models based on exemplar  
394 coding. As expected, effects in the early visual cortex were consistent primarily with the  
395 Gabor-filter model. In all cases, the winning models' performance depended on the  
396 inclusion of a measurement-level population-averaging mechanism, which  
397 approximates how individual model units are locally averaged in functional imaging  
398 measurements.

### 399 ***Functional MRI responses in the fusiform face area are best explained*** 400 ***by sigmoidal-ramp-tuning and Gabor-filter models***

401        Out of the models we considered, the best accounts for the fusiform face area were a  
402 face-space-based sigmoidal-ramp-tuning model and an image-based Gabor-filter model.  
403 Exemplar-coding models exhibited relatively lower generalization performance, or  
404 made inaccurate predictions for regional-mean fMRI activation profiles. Importantly, the  
405 advantage for both the sigmoidal-ramp and Gabor-filter model depended on the  
406 measurement-level population averaging mechanism. The key contribution of our  
407 modeling effort is to narrow the set of plausible representational models for the  
408 fusiform face area to two models that can explain both representational distances and  
409 the regional-mean activation profile.



410 It may appear surprising that a face-space coding model based on sigmoidal-ramp  
411 tuning and an image-based model based on Gabor filters should perform so similarly  
412 when fitted to face spaces in the fusiform face area. However, the sigmoidal-ramp-  
413 tuning model captures continuous variation in face shape and texture, which covaries  
414 with low-level image similarity. For instance, local curvature likely increases with face  
415 space eccentricity and is encoded in a ramp-like manner at intermediate stages of visual  
416 processing in macaque V4 (27). Conversely, the Gabor-filter model likely possesses  
417 sensitivity to face-space direction because the contrast of local orientation content  
418 varies with major face features such as eyebrow or lip thickness. There are multiple  
419 ways to parameterize face space, not all of which require domain-specific face features.  
420 This might also clarify why scene-selective areas such as the parahippocampal place  
421 area exhibited somewhat similar representational spaces as face-selective regions in the  
422 current study. Such widely-distributed face-exemplar effects are consistent with  
423 previous decoding studies (2,4). The Gabor-filter model provides one simple account for  
424 how such widely distributed face-exemplar effects can arise. It is likely that the face-  
425 space effects we report are driven at least in part by a general mechanism for object  
426 individuation in visual cortex rather than the engagement of specialized processing for  
427 face recognition.

428 ***Symmetric-view tolerance and over-representation of eccentricity in***  
429 ***representational distances can be modeled as an fMRI measurement***  
430 ***effect***

431 The models we evaluate here raise the provocative possibility that in some cases,  
432 fMRI effects that might conventionally be attributed to high-level featural coding could  
433 instead arise from the neuroimaging measurement process. Such an explanation  
434 appears possible for two effects in our data. First, even though the Gabor-filter model is  
435 a single-layer network with limited representational flexibility, this model nevertheless

436 exhibited near-complete tolerance to mirror-symmetric viewpoint changes, when  
437 coupled with measurement-level population averaging. Second, both this model and the  
438 sigmoidal-ramp-tuning model showed greater over-representation of eccentricity when  
439 measurement-level population averaging was enabled, suggesting that this over-  
440 representation in the fMRI data might also plausibly arise through local averaging in  
441 voxels.

442 Previous studies have tended to interpret view-tolerant fMRI effects in terms of  
443 cortical processing to support invariant object recognition (2,34,35). The Gabor-filter  
444 model suggests a mechanism by which functional imaging measures can exaggerate  
445 apparent view-tolerance through spatial pooling over neuronal responses. This result  
446 does not contradict previous reports of view-tolerant coding for faces in neuronal  
447 population codes measured with single-unit recording (36–39), but rather  
448 demonstrates that the type of tolerance to symmetric viewpoint changes that we  
449 observed in the current study can be explained without resorting to such intrinsic view-  
450 tolerant mechanisms (see also Ramirez et al. (40)). Such findings may go some way  
451 toward reconciling apparent discrepancies between single-unit and functional imaging  
452 data. For instance, tolerance to symmetrical viewpoints is widespread in human visual  
453 cortex when measured with fMRI (34), but appears specific to a subset of regions in the  
454 macaque face-patch system when measured with single-unit recordings (36). These  
455 results are only contradictory if the measurement process is not considered. In  
456 summary, we demonstrate that measurement effects can produce apparent view  
457 tolerance in fMRI data. This finding does not suggest that fMRI cannot detect view-  
458 tolerant coding (see also 41). For example, population averaging may not account for all  
459 cases of non-symmetric view tolerance. However, our results do suggest that modeling  
460 of the measurement process is important to correctly infer the presence of such  
461 mechanisms from neuroimaging measurements.

462 ***Greater regional-mean activation for distinctive faces can arise from***  
463 ***local averaging of neuronal responses***

464 The winning models in this study exemplify how sensitivity to face-space eccentricity at  
465 the regional-mean activation level can arise as an artifact of averaging, with no  
466 individual neuron encoding distinctiveness or an associated psychological construct.  
467 Previous functional imaging studies often interpreted response modulations with face  
468 eccentricity as evidence for coding of distinctiveness or related social perception  
469 attributes (21–23,43). However, both the face-space-based sigmoidal-ramp-tuning  
470 model and the image-based Gabor-filter model exhibited increasing population-average  
471 responses with eccentricity, even though neither model encodes eccentricity at the level  
472 of its units. Although one could, of course, construct a competing model that explicitly  
473 codes eccentricity, the models used here are more consistent with single-unit recording  
474 studies, where cells generally are tuned to particular features, with a preference for  
475 extreme values, rather than responding to eccentricity regardless of direction  
476 (20,27,28). Here we demonstrate that when the local averaging of such biologically  
477 plausible neuronal tunings is modeled, eccentricity sensitivity emerges without  
478 specialized encoding of this particular variable. Related effects have been reported in  
479 attention research, where response-gain and contrast-modulation effects at the single-  
480 neuron level may sum to similar additive-offset effects at the fMRI-response level (44).  
481 In summary, direct interpretation of regional-mean fMRI activations in terms of  
482 neuronal tuning can be misleading when the underlying neuronal populations are  
483 heterogeneous.

484 ***Modeling of measurement-level population averaging is important for***  
485 ***computational studies of cortical representation***

486 A simple model of measurement-level population averaging was sufficient here to  
487 substantially improve the generalization performance of multiple computational models

488 for multiple cortical regions. The precise way that fMRI voxels sample neuronal activity  
489 patterns remains a topic of debate (30,31,33,45). A mechanistic model of voxel-sampling  
490 is unlikely to be robustly identifiable at the single-voxel level. However, under the  
491 simple assumption that voxels average random subsets of neurons with nonnegative  
492 weights, the effect on the apparent representational geometry will be a uniform  
493 stretching along the all-one vector (representing the population average). Here we  
494 approximated this effect for models with nonlinear parameters by mixing the  
495 population average into the predicted representational feature space. Despite the  
496 simplicity of this method, our noise-ceiling estimates indicate that the winning models  
497 captured nearly all the explainable variance in the current dataset. For model  
498 representations without nonlinear parameters, this measurement model can be  
499 implemented more easily by linearly combining the model's original distance matrix and  
500 the distance matrix obtained for the population average dimension of the space (using  
501 squared Euclidean distances estimates, see also 46–48). Thus, the measurement-level  
502 population averaging mechanism we propose here is widely and easily applicable to any  
503 case where a computational model is compared to neuroimaging data at the distance-  
504 matrix level.

505 The distance-matrix effects of local pooling of neuronal responses in fMRI voxels is  
506 correctly accounted for by our measurement model under the assumption that neurons  
507 are randomly intermixed in cortex (i.e. voxels sample random subsets of neurons). This  
508 simplifying assumption is problematic for early visual areas, where there is a well-  
509 established retinotopic organization with a strong contralateral response preference.  
510 For the retinotopic Gabor filter model, we therefore added a hemifield-specific pooling  
511 stage, which helped account for strong view-sensitivity in occipital regions of interest.  
512 Accounting for measurement effects in the presence of topographic organization is likely  
513 to prove more challenging for naturalistic stimulus sets. One solution is to account for  
514 local averaging in fMRI voxels by local averaging of the model's internal

515 representational map (42). This local-pooling approach can be thought of as providing a  
516 further constraint on the comparison between model and data, because smoothing the  
517 model representation is only expected to improve the fit if the model response  
518 topography resembles the cortical topography. This may provide a means of  
519 adjudicating between topographically organized models, even when the models predict  
520 similar distance matrices in the absence of measurement-effect modeling. In summary,  
521 the global population average is a special dimension of the representational space,  
522 which is overrepresented in voxels that pool random subsets of neurons. This effect  
523 accounts for much variance in the representational distances in the current study, and is  
524 easy to model. Modeling the overrepresentation of the global average, as we did here, is  
525 suitable for models that do not predict a spatial organization (e.g. face-space coding  
526 models). For models that do predict a spatial organization, it may be more appropriate  
527 to simulate fMRI voxels by local averaging of the model's representational map (42).

### 528 ***Model comparison is essential for computational neuroimaging***

529 This study demonstrates the importance of considering multiple alternative models  
530 to guide progress in computational neuroimaging. In particular, the finding that  
531 practically every model we evaluated exhibited significantly greater-than-zero  
532 generalization performance strongly suggests how studies that only evaluate a limited  
533 set of candidate models can arrive at misleading conclusions (see e.g. 49).

534 Although the central goal of model comparison is to select the best account of the  
535 data, the finding that some models are not dissociable under the current experimental  
536 context also has important implications for the design of future studies. Here we  
537 demonstrated that Gaussian-distributed exemplar-coding models are less likely to  
538 account for human face coding, while accounts based on sigmoidal ramp tuning and  
539 Gabor filter outputs perform very similarly. This suggests the need to design stimulus  
540 sets that generate distinct predictions from these winning models. For example,

541 presenting face stimuli on naturalistic textured backgrounds may be sufficient to  
542 adjudicate between the two models, because the Gabor-filter model lacks a mechanism  
543 for figure-ground separation. In conclusion, our study exemplifies the need to test and  
544 compare multiple models and suggests routes by which the sigmoidal-ramp-tuning  
545 model of face-space coding could be further evaluated.

## 546 ***Materials and Methods***

### 547 ***Data and software availability***

548 The distance matrices we estimated for cortical and perceptual face spaces are  
549 available, along with software to re-generate all computational model fits (separate  
550 copies deposited on <https://osf.io/5g9rv>; <https://doi.org/10.5281/zenodo.242666>).

### 551 ***Sampling the reference PCA face space***

552 We generated faces using a norm-based model of 3D face shape and texture, which  
553 has been described in detail previously (15,25). Briefly, the model comprises two PCA  
554 solutions (each trained on 200 faces), one based on 3D shape estimated from laser scans  
555 and another based on texture estimated from digital photographs. The components of  
556 each PCA solution are considered dimensions in a space that describes natural variation  
557 in facial appearance. All stimulus generation was performed using the PCA solution  
558 offered by previous investigators, and no further fitting was performed for this study.  
559 We yoked the shape and texture solutions in all subsequent analyses since we did not  
560 have distinct hypotheses for these.

561 We developed a method for sampling faces from the reference PCA space in a  
562 manner that would maximize dissimilarity variance. This is related to the concept of  
563 design efficiency in univariate general linear modeling (51), and involves maximizing  
564 the variance of hypothesized distances over the stimulus set. Because randomly  
565 sampled distances in high dimensional spaces tend to fall in a narrow range of distances  
566 relative to the norm (52), we reduced each participant's effective face space to 2D by  
567 specifying a plane which was centered on the norm of the space and extended at a  
568 random orientation. The face exemplars constituted a polar grid on this plane, with 4  
569 directions at 60 degrees separation and 3 eccentricity levels (scaled at 30%, 100% and  
570 170% of the mean eccentricity in the training face set). The resulting half-circle grid on a

571 plane through the high-dimensional space is adequate for addressing our hypotheses  
572 concerning the relative role of direction and eccentricity coding under the assumption  
573 that the high-dimensional space is isotropic. The orientation of the face-space slice was  
574 randomized between participants and model fits were based on cross-validation over  
575 participants. Under these conditions, any non-isotropy is only expected to impair  
576 generalization performance. In preliminary tests we observed that this method yielded  
577 substantially greater dissimilarity variance estimates than methods based on Gaussian  
578 or uniform sampling of the space.

### 579 ***Face animation preparation***

580 We used Matlab software to generate a 3D face mesh for each exemplar. This mesh  
581 was rendered at each of the orientations of interest in the study in a manner that  
582 centered the axis of rotation on the bridge of the nose for each face. This procedure  
583 ensured that the eye region remained centered on the fixation point throughout each  
584 animation in order to discourage eye movements. Renders were performed at sufficient  
585 increments to enable 24 frames per second temporal resolution in the resulting  
586 animations. Frames were converted to gray-scale and cropped with a feathered oval  
587 aperture to standardize the outline of each face and to remove high-contrast mesh edges  
588 from the stimulus set. Finally, we performed a frame-by-frame histogram equalization  
589 procedure where the average histogram for each frame was imposed on each individual  
590 face. Thus, the histogram was allowed to vary across time but not across faces. Note that  
591 histogram matching implies that the animations also have identical mean gray-scale  
592 intensity and root-mean-square contrast.

593 A potential concern with these matching procedures is that they could affect the  
594 validity of the comparison to the reference PCA space. However, we found that the  
595 opposite appeared to be true: distances in the reference PCA space were more  
596 predictive of pixelwise correlation distances in the matched images than in the original



597 images. Thus, the matching procedure did not remove features that were encoded in the  
598 PCA space and may in fact have acted to emphasize such features.

### 599 ***Participants***

600 10 healthy human participants participated in a similarity judgment task and fMRI  
601 scans. The psychophysical task comprised 4 separate days of data collection which were  
602 completed prior to 4 separate days of fMRI scans. All procedures were performed under  
603 a protocol approved by the Cambridge Psychology Research Ethics Committee (CPREC).  
604 Participants were recruited from the local area (Cambridge, UK) and were naïve with  
605 regard to the purposes of the study. Five additional participants participated in initial  
606 data collection but were not invited to complete the study due to difficulties with  
607 vigilance, fixation stability, claustrophobia and/or head movements inside the scanner.  
608 The analyses reported here include all complete datasets that were collected for the  
609 study.

### 610 ***Perceptual similarity judgment experiment***

611 We used a pair-of-pairs task to characterize perceptual similarity (S1 Movie).  
612 Participants were presented with two vertically offset pairs of faces on a standard LCD  
613 monitor under free viewing conditions, and judged which pair was relatively more  
614 dissimilar with a button press on a USB keyboard (two-alternative force choice). Each  
615 face rotated continuously between a leftward and a rightward orientation (45 degrees  
616 left to 45 degrees right of a frontal view over 3 seconds). Ratings across all possible  
617 pairings of face pairs (2145 trials: all pairings of the 66 possible pairs of the 12 faces)  
618 were combined into a distance matrix for each participant, where each entry reflects the  
619 percentage of trials on which that face pair was rated as relatively more dissimilar.

## 620 ***Functional MRI experiment***

621 We measured brain response patterns evoked by faces in a rapid event-related fMRI  
622 experiment (S2 Movie). Participants fixated on a central point of the screen where a  
623 pseudo-random sequence of face animations appeared (7 degrees visual angle in height,  
624 2s on, 1s fixation interval). We verified fixation accuracy online and offline using an  
625 infrared eye tracking system (Sensomotoric Instruments, 50Hz monocular acquisition).  
626 The faces rotated outward in leftward and rightward directions on separate trials (18 to  
627 45 degrees rotation left or right of a frontal view), and participants responded with a  
628 button press to occasional face repetitions regardless of rotation (one-back task). This  
629 served to encourage attention to facial identity rather than to incidental low-level  
630 physical features. Consistent with a task strategy based on identity recognition rather  
631 than image matching, participants were sensitive to exemplar repetitions within  
632 viewpoint (mean  $d' \pm 1$  standard deviation  $2.68 \pm 0.62$ ) and to exemplar repetitions  
633 where the viewpoint changed ( $2.39 \pm 0.52$ ).

634 The experiment was divided into 16 runs where each run comprised 156 trials  
635 bookended by 10s fixation intervals. Each scanner run comprised two experimental  
636 runs, which were modeled independently in all subsequent analyses. The trial order in  
637 each run was first-order counterbalanced over the 12 faces using a De Bruijn sequence  
638 (53) with 1 additional repetition (diagonal entries in transfer matrix) added to each face  
639 in order to make the one-back repetition task more engaging and to increase design  
640 efficiency (51). The rotation direction in which each face appeared was randomized  
641 separately, since a full 24-stimulus De Bruijn sequence would have been over-long (576  
642 trials). Although the resulting 24-stimulus sequences were not fully counter-balanced,  
643 we used an iterative procedure to minimize any inhomogeneity by rejecting rotation  
644 direction randomizations that generated off-diagonal values other than 0 and 1 in the  
645 24-condition transfer matrix (that is, each possible stimulus-to-stimulus transfer in the  
646 sequence could appear once or not at all). These homogeneous trial sequences served to

647 enhance cross-validation performance by minimizing over-fitting to idiosyncratic trial  
648 sequence biases in particular runs. We modeled the data from each run with one  
649 predictor per face exemplar and viewpoint.

### 650 ***Magnetic resonance imaging acquisition***

651 Functional and structural images were collected at the MRC Cognition and Brain  
652 Sciences Unit (Cambridge, UK) using a 3T Siemens Tim Trio system and a 32-channel  
653 head coil. Functional runs used a 3D echoplanar imaging sequence (2mm isotropic  
654 voxels, 30 axial slices, 192 x 192mm field of view, 128 x 128 matrix, TR=53ms,  
655 TE=30ms, 15° flip angle, effective acquisition time 1.06s per volume) with GRAPPA  
656 acceleration (acceleration factor 2 x 2, 40 x 40 PE lines). Each participant's functional  
657 dataset (7376 volumes over 8 scanner runs for the main experiment) was converted to  
658 NIFTI format and realigned to the mean of the first session's first experimental run  
659 using standard functionality in SPM8 ([fil.ion.ucl.ac.uk/spm/software/spm8/](http://fil.ion.ucl.ac.uk/spm/software/spm8/)). A  
660 structural T1-weighted volume was collected in the first session using a multi-echo  
661 MPAGE sequence (1mm isotropic voxels)(54). The structural image was de-noised  
662 using previously described methods (55), and the realigned functional dataset's header  
663 was co-registered with the header of the structural volume using SPM8 functionality.  
664 The structural image was then skull-stripped using the FSL brain extraction tool  
665 ([fmrib.ox.ac.uk/fsl](http://fmrib.ox.ac.uk/fsl)), and a re-sliced version of the resulting brain mask was applied to  
666 the fMRI dataset to remove artifacts from non-brain tissue. We constructed design  
667 matrices for each run of the experiment by convolving the onsets of experimental events  
668 with the SPM8 canonical hemodynamic response function. Slow temporal drifts in MR  
669 signal were removed by projecting out the contribution of a set of nuisance trend  
670 regressors (polynomials of degrees 0-4) from the design matrix and the fMRI data in  
671 each run.

## 672 ***Cross-validated discriminant analysis***

673 We estimated the neural discriminability of each face pair for each region of interest  
674 using a cross-validated version of the Mahalanobis distance (56). This analysis improves  
675 on the related Fisher's linear discriminant classifier by providing a continuous metric of  
676 discriminability without ceiling effects. Similarly to the linear discriminant, classifier  
677 weights were estimated as the contrast between each condition pair multiplied by the  
678 inverse of the covariance matrix of the residual time courses, which was estimated using  
679 a sparse prior (57). This discriminant was estimated separately for the concatenated  
680 design matrix and fMRI data in each possible leave-one-run-out training split, and the  
681 resulting weights were transformed to unit length and projected onto the contrast  
682 estimates from each training split's corresponding test run (16 estimates per contrast).  
683 The 16 run-specific distance estimates were averaged to obtain the final neural  
684 discriminability estimate for that participant and region. When the same data is used to  
685 estimate the discriminant and evaluate its performance, this algorithm returns the  
686 Mahalanobis distance, provided that a full rather than sparse covariance estimator is  
687 used (56). However, unlike a true distance measure, the cross-validated version that we  
688 use here is centered on 0 under the null hypothesis. This motivates summary-statistic  
689 random-effects inference for above-chance performance using conventional T tests.

690 We developed a variant of this discriminant analysis where effects that might be  
691 broadly described as region-mean-related are removed (S4 Figure). This control  
692 analysis involved two modifications to how contrasts were calculated at the level of  
693 forming the discriminant and at the level of evaluating the discriminant on independent  
694 data. First, each parameter estimate was set to a mean of zero in order to remove any  
695 additive offsets in response levels between the conditions. Second, for each pair of  
696 mean-subtracted parameter estimates, the linear contribution of the mean estimate  
697 over the pair was removed from each estimate before calculating the contrast. This  
698 corrects for the case where a single response pattern is multiplicatively scaled by the

699 conditions. The resulting control analysis is insensitive to effects driven by additive or  
700 multiplicative scaling offsets between the conditions.

### 701 ***Multiple regression RSA***

702 We used a multiple regression model to estimate the relative contribution of  
703 eccentricity and direction to cortical and perceptual face-space representations.  
704 Multiple regression fits to distance estimates can be performed after a square transform,  
705 since squared distances sum according to the Pythagorean theorem. We partitioned the  
706 squared distances in the reference PCA space into variance associated with eccentricity  
707 changes by creating a distance matrix where each entry reflected the minimum distance  
708 for its eccentricity group in the squared reference PCA matrix (that is, cases along the  
709 group's diagonal where there was no direction change). The direction matrix was then  
710 constructed as the difference between the squared reference PCA matrix and the  
711 eccentricity matrix (Figure 2a). These predictors were vectorized and entered into a  
712 multiple regression model together with a constant term. This partitioning of the  
713 dissimilarity variance in the reference PCA matrix is complete in the sense that a  
714 multiple regression RSA model where the reference PCA matrix is used as the  
715 dependent variable yields parameter estimates of [1,1,0] for eccentricity, direction and  
716 constant, respectively, with no residual error. These three predictors were then split  
717 according to viewpoint, with separate sets of predictors for distances within and across  
718 viewpoint. The absolute values of the cortical and perceptual distance matrices were  
719 squared and then transformed back to their original sign before being regressed on the  
720 predictor matrix using ordinary least squares. Finally, the absolute values of the  
721 resulting parameter estimates were square-root transformed and returned to their  
722 original signs.

723 ***Functional regions of interest***

724 We used a conventional block-based functional localizer experiment to identify  
725 category-selective and visually-responsive regions of interest in human visual cortex.  
726 Participants fixated a central cross on the screen while blocks of full-color images were  
727 presented (36 images per block presented with 222ms on, 222ms off, 16 s fixation).  
728 Participants were instructed to respond to exact image repetitions within the block.  
729 Each run comprised 3 blocks each of faces, scenes, objects and phase-scrambled  
730 versions of the scene images. Each participant's data (8 runs of 380 volumes) was  
731 smoothed with a Gaussian kernel (6mm full width at half maximum) and responses to  
732 each condition were estimated using a standard SPM8 first-level model. Regions of  
733 interest were identified using a region-growing approach, where a peak coordinate for  
734 each region was identified in individual participants, and a region of interest was grown  
735 as a contiguous set of the most selective 100 voxels extending from this coordinate. We  
736 defined the face-selective occipital and fusiform face areas with the minimum-statistic  
737 conjunction contrast of faces over objects and faces over baseline, and the scene-  
738 selective parahippocampal place area and transverse occipital sulcus as the minimum-  
739 statistic conjunction contrast of scenes over objects and scenes over baseline, and the  
740 early visual cortex as the contrast of scrambled stimuli over the fixation baseline. We  
741 also attempted to localize a face-selective region in the posterior superior temporal  
742 sulcus, a face-selective region in anterior inferotemporal cortex and a scene-selective  
743 region in retrosplenial cortex, but do not report results for these regions here since they  
744 could only be identified in a minority of the participants. All regions of interest were  
745 combined into bilateral versions before further analysis since we did not have distinct  
746 predictions concerning functional lateralization.

## 747 ***Sigmoidal ramp tuning model***

748 The sigmoidal ramp model comprises 1000 model units, each of which exhibits a  
749 monotonically increasing response in a random direction extending from the origin of  
750 the face space (Figure 3). The response  $y$  at position  $x$  along the preferred direction is  
751 described by the sigmoid

$$752 \quad y[\text{raw}] = 1 / (1 + \exp((-x+o)/s));$$

753 where the free parameters are  $o$ , which specifies the horizontal offset of the  
754 response function (zero places the midpoint of the response function at the norm of the  
755 space, values greater than zero corresponds to responses shifted away from the norm),  
756 and  $s$ , which defines response function saturation (4 corresponds to a near-linear  
757 response in the domain of the face exemplars used here, while values near zero  
758 correspond to a step-like increase in response). The raw output of each model unit is  
759 then translated toward the population-mean response

$$760 \quad y[\text{final}] = (y[\text{raw}] - y[\text{mean}]) * (1-p) + y[\text{mean}]$$

761 where  $p$  is a free parameter that defines the strength of measurement-level  
762 population averaging (0 corresponds to no averaging, 1 corresponds to each model unit  
763 returning the population-mean response).

## 764 ***Exemplar model***

765 The exemplar model comprises 1000 model units, each of which prefers a Cartesian  
766 coordinate in the face space with response fall-off captured by an isotropic Gaussian.  
767 The free parameters are  $w$ , which controls the full width at half-maximum tuning width  
768 of the Gaussian response function, and  $d$ , which controls the width of the Gaussian  
769 distribution of tuning centers (0.1 places  $Z=2.32$  at 10% of the eccentricity of the  
770 caricatures while 3 places this tail at 300% of the eccentricity of the caricatures).

771 We also constructed an inverted-Gaussian variant of this model where the  
772 distribution of distances was inverted at  $Z=2.32$  and negative distances truncated to  
773 zero (1% of exemplars). This model was fitted with similar parameters as the original  
774 Gaussian exemplar model.

### 775 ***Gabor filter model***

776 The Gabor filter model is an adaptation of a neuroscientifically-inspired model that  
777 has previously been used to successfully predict single-voxel responses in the early  
778 visual cortex (24, [github.com/kendrickkay/knknutils/tree/master/imageprocessing](https://github.com/kendrickkay/knknutils/tree/master/imageprocessing)).  
779 The model is composed of 5 banks of Gabor filters varying in spatial position, phase (2  
780 values) and orientation (8 directions, Figure 4). We measured each filter's response to  
781 the last frame of each animation, and corrected for phase shifts. The resulting rectified  
782 response vectors were weighted according to filter bank membership (5 free  
783 parameters). We estimated measurement-level population averaging using two pooling  
784 stages: a hemifield-specific pool, where filters were pooled according to whether their  
785 centers fell left or right of the vertical meridian, followed by a global pool.

### 786 ***Pixelwise correlation predictor***

787 We used a fixed control predictor to estimate whether coding based on pixelwise  
788 features would produce the same face space warping we observed in our data (Figure  
789 4). The pixelwise correlation predictor was generated by stacking all the pixels in each  
790 of the face animations into vectors and estimating the correlation distance between  
791 these intensity values.

### 792 ***Estimating the noise ceiling***

793 We estimated the noise ceiling for Z-transformed Pearson correlation coefficients  
794 based on methods described previously (56). This method estimates the explained  
795 variance that is expected for the true model given noise levels in the data. Although the



796 true noise level of the data cannot be estimated, it is possible to approximate its upper  
797 and lower bounds in order to produce a range within which the true noise ceiling is  
798 expected to reside. The lower bound estimate is obtained by a leave-one-participant-out  
799 cross-validation procedure where the mean distance estimates of the training split are  
800 correlated against the left-out-participant's distances, while the upper bound is obtained  
801 by performing the same procedure without splitting the data. These estimates were  
802 visualized as a shaded region in figures after reversing the Z-transform (Figure 4).

### 803 ***Statistical inference***

804 All statistical inference was performed using T-tests at the group-average level  
805 (N=10 in all cases except the occipital face area and transverse occipital sulcus, N=9).  
806 Correlation coefficients were Z-transformed prior to statistical testing. Average Z  
807 statistics were reverse-transformed before visualization for illustrative purposes.

808 Fold-wise generalization performance estimates are partially dependent, which can  
809 lead to sample variance underestimates (58,59) and greater than intended false positive  
810 rates when conventional parametric statistics are used. However, we simulated the  
811 effects of this potential bias and found no consistent inflation in false-positive rates for  
812 simulations of the parameters used in the current study (S1 Code, S8 Figure, S9 Figure).  
813 Thus, the inferential statistics reported in the current study appear to be robust to this  
814 slight dependence and maintain their intended frequentist properties.

815 ***Acknowledgments***

816       We are grateful to Jenna Parker for assistance with data collection and to Marta  
817       Correia for assistance with 3D EPI protocols. This work was funded by a British  
818       Academy Postdoctoral fellowship (J.D.C) and by a grant from ERC (N.K., code 261352).

## 819 **References**

- 820 1. Anzellotti S, Caramazza A. From parts to identity: Invariance and sensitivity of  
821 face representations to different face halves. *Cereb Cortex*. :1–10.
- 822 2. Anzellotti S, Fairhall SL, Caramazza A. Decoding representations of face identity  
823 that are tolerant to rotation. *Cereb Cortex [Internet]*. 2014 Mar 5 [cited 2013 Mar  
824 6];24:1988–95. Available from:  
825 <http://www.cercor.oxfordjournals.org/cgi/doi/10.1093/cercor/bht046>
- 826 3. Axelrod V, Yovel G. Successful decoding of famous faces in the fusiform face area.  
827 *PLoS One [Internet]*. 2015;10:e0117126. Available from:  
828 <http://dx.plos.org/10.1371/journal.pone.0117126>
- 829 4. Goesaert E, Op de Beeck HP. Representations of facial identity information in the  
830 ventral visual stream investigated with multivoxel pattern analyses. *J Neurosci*  
831 *[Internet]*. 2013 May 8 [cited 2013 May 8];33(19):8549–58. Available from:  
832 <http://www.jneurosci.org/cgi/doi/10.1523/JNEUROSCI.1829-12.2013>
- 833 5. Kriegeskorte N, Formisano E, Sorger B, Goebel R. Individual faces elicit distinct  
834 response patterns in human anterior temporal cortex. *Proc Natl Acad Sci*.  
835 2007;104:20600–5.
- 836 6. Natu VS, Jiang F, Narvekar A, Keshvari S, Blanz V, O’Toole AJ. Dissociable neural  
837 patterns of facial identity across changes in viewpoint. *J Cogn Neurosci*.  
838 2010;22(7):1570–82.
- 839 7. Nestor A, Plaut DC, Behrmann M. Unraveling the distributed neural code of facial  
840 identity through spatiotemporal pattern analysis. *Proc Natl Acad Sci [Internet]*.  
841 2011 May 31 [cited 2011 Jun 1];108:9998–10003. Available from:  
842 <http://www.pnas.org/cgi/doi/10.1073/pnas.1102433108>
- 843 8. Nestor A, Behrmann M, Plaut DC. The neural basis of visual word form  
844 processing: A multivariate investigation. *Cereb Cortex [Internet]*. 2013 Jun 12  
845 [cited 2013 Jun 5];23:1673–84. Available from:  
846 <http://www.ncbi.nlm.nih.gov/pubmed/22693338>
- 847 9. Gao X, Wilson HR. The neural representation of face space dimensions.  
848 *Neuropsychologia [Internet]*. Elsevier; 2013 Jul 10 [cited 2013 Aug  
849 11];51(10):1787–93. Available from:  
850 <http://www.ncbi.nlm.nih.gov/pubmed/23850598>
- 851 10. Verosky SC, Todorov A, Turk-Browne NB. Representations of individuals in  
852 ventral temporal cortex defined by faces and biographies. *Neuropsychologia*  
853 *[Internet]*. Elsevier; 2013 Jul 16 [cited 2013 Jul 23];51:2100–8. Available from:  
854 <http://www.ncbi.nlm.nih.gov/pubmed/23871881>
- 855 11. Kriegeskorte N, Mur M, Bandettini PA. Representational similarity analysis -  
856 connecting the branches of systems neuroscience. *Front Syst Neurosci*. 2008;2:1–  
857 28.
- 858 12. Haxby J V, Hoffman E, Gobbini M. The distributed human neural system for face  
859 perception. *Trends Cogn Sci*. 2000;4:223–33.
- 860 13. Bruce V, Young AW. Understanding face recognition. *Br J Psychol [Internet]*. 1986  
861 Aug [cited 2010 Sep 23];77 ( Pt 3):305–27. Available from:  
862 <http://www.ncbi.nlm.nih.gov/pubmed/3756376>
- 863 14. Valentine T. A unified account of the effects of distinctiveness, inversion, and race  
864 in face recognition. *Q J Exp Psychol [Internet]*. 1991 [cited 2011 Jun

- 865 14];43A(2):161–204. Available from:  
866 <http://www.informaworld.com/index/776369317.pdf>
- 867 15. Blanz V, Vetter T. A morphable model for the synthesis of 3D faces. Proc 26th  
868 Annu Conf Comput Graph Interact Tech - SIGGRAPH '99 [Internet]. New York,  
869 New York, USA: ACM Press; 1999;187–94. Available from:  
870 <http://portal.acm.org/citation.cfm?doid=311535.311556>
- 871 16. O'Toole AJ, Abdi H, Deffenbacher KA, Valentin D. Low-dimensional representation  
872 of faces in higher dimensions of the face space. J Opt Soc Am A [Internet]. 1993  
873 [cited 2012 Jun 14];10(3):405–15. Available from:  
874 <http://www.opticsinfobase.org/abstract.cfm?id=4552>
- 875 17. Ross DA, Hancock PJB, Lewis MB. Changing faces: Direction is important. Vis cogn  
876 [Internet]. 2010 Jan [cited 2012 May 30];18(1):67–81. Available from:  
877 <http://www.tandfonline.com/doi/abs/10.1080/13506280802536656>
- 878 18. Schulz C, Kaufmann JM, Walther L, Schweinberger SR. Effects of anticaricaturing  
879 vs. caricaturing and their neural correlates elucidate a role of shape for face  
880 learning. Neuropsychologia [Internet]. 2012 Jun 27 [cited 2012 Aug 1];50:2426–  
881 34. Available from: <http://www.ncbi.nlm.nih.gov/pubmed/22750120>
- 882 19. Wilson HR, Loffler G, Wilkinson F. Synthetic faces, face cubes, and the geometry of  
883 face space. Vision Res [Internet]. 2002 Dec;42(27):2909–23. Available from:  
884 <http://www.ncbi.nlm.nih.gov/pubmed/12450502>
- 885 20. Leopold DA, Bondar I V, Giese MA. Norm-based face encoding by single neurons  
886 in the monkey inferotemporal cortex. Nature [Internet]. 2006 Aug  
887 3;442(7102):572–5. Available from:  
888 <http://www.ncbi.nlm.nih.gov/pubmed/16862123>
- 889 21. Loffler G, Yourganov G, Wilkinson F, Wilson HR. fMRI evidence for the neural  
890 representation of faces. Nat Neurosci. 2005;10:1386–90.
- 891 22. Davidenko N, Remus D a., Grill-Spector K. Face-likeness and image variability  
892 drive responses in human face-selective ventral regions. Hum Brain Mapp  
893 [Internet]. 2012 Aug 5 [cited 2011 Aug 7];33:2334–49. Available from:  
894 <http://doi.wiley.com/10.1002/hbm.21367>
- 895 23. Said CP, Dotsch R, Todorov A. The amygdala and FFA track both social and non-  
896 social face dimensions. Neuropsychologia [Internet]. Elsevier Ltd; 2010 Aug  
897 [cited 2010 Sep 7];48(12):3596–605. Available from:  
898 <http://www.ncbi.nlm.nih.gov/pubmed/20727365>
- 899 24. Kay KN, Naselaris T, Prenger RJ, Gallant JL. Identifying natural images from  
900 human brain activity. Nature. 2008;452:352–5.
- 901 25. Paysan P, Knothe R, Amberg B, Romdhani S, Vetter T. A 3D Face Model for Pose  
902 and Illumination Invariant Face Recognition. 2009 Sixth IEEE Int Conf Adv Video  
903 Signal Based Surveill [Internet]. Ieee; 2009 Sep;296–301. Available from:  
904 <http://ieeexplore.ieee.org/lpdocs/epic03/wrapper.htm?arnumber=5279762>
- 905 26. Westfall J, Nichols TE, Yarkoni T. Fixing the stimulus-as-fixed-effect fallacy in task  
906 fMRI. BioRxiv. 2016;
- 907 27. Pasupathy A, Connor CE. Shape Representation in Area V4 : Position-Specific  
908 Tuning for Boundary Conformation. J Neurophysiol. 2001;86:2505–19.
- 909 28. Freiwald WA, Tsao DY, Livingstone M. A face feature space in the macaque  
910 temporal lobe. Nat Neurosci. 2009;12:1187.
- 911 29. Boynton GM. Spikes, BOLD, attention, and awareness: a comparison of  
912 electrophysiological and fMRI signals in V1. J Vis [Internet]. 2011 Jan;11(5):12.

- 913 Available from:  
914 <http://www.pubmedcentral.nih.gov/articlerender.fcgi?artid=4124818&tool=pm>  
915 [centrez&rendertype=abstract](http://www.pubmedcentral.nih.gov/articlerender.fcgi?artid=4124818&tool=pm)
- 916 30. Goense J, Logothetis N. Neurophysiology of the BOLD fMRI signal in awake  
917 monkeys. *Curr Biol*. 2008;18:631–40.
- 918 31. Logothetis NK, Pauls J, Augath M, Trinath T, Oeltermann a. Neurophysiological  
919 investigation of the basis of the fMRI signal. *Nature* [Internet]. 2001 Jul  
920 12;412(6843):150–7. Available from:  
921 <http://www.ncbi.nlm.nih.gov/pubmed/11449264>
- 922 32. Sirotin Y, Das A. Anticipatory haemodynamic signals in sensory cortex not  
923 predicted by local neuronal activity. *Nature*. 2009;457:475–9.
- 924 33. Cardoso MMB, Sirotin YB, Lima B, Glushenkova E, Das A. The neuroimaging signal  
925 is a linear sum of neurally distinct stimulus- and task-related components. *Nat*  
926 *Neurosci* [Internet]. Nature Publishing Group; 2012;15(9):1298–306. Available  
927 from: <http://dx.doi.org/10.1038/nn.3170>
- 928 34. Kietzmann TC, Swisher JD, Konig P, Tong F. Prevalence of Selectivity for Mirror-  
929 Symmetric Views of Faces in the Ventral and Dorsal Visual Pathways. *J Neurosci*  
930 [Internet]. 2012 Aug 22 [cited 2012 Aug 22];32(34):11763–72. Available from:  
931 <http://www.jneurosci.org/cgi/doi/10.1523/JNEUROSCI.0126-12.2012>
- 932 35. Axelrod V, Yovel G. Hierarchical Processing of Face Viewpoint in Human Visual  
933 Cortex. *J Neurosci* [Internet]. 2012 Feb 14 [cited 2012 Feb 14];32(7):2442–52.  
934 Available from: [http://www.jneurosci.org/cgi/doi/10.1523/JNEUROSCI.4770-](http://www.jneurosci.org/cgi/doi/10.1523/JNEUROSCI.4770-11.2012)  
935 [11.2012](http://www.jneurosci.org/cgi/doi/10.1523/JNEUROSCI.4770-11.2012)
- 936 36. Freiwald WA, Tsao DY. Functional compartmentalization and viewpo--int  
937 generalization within the macaque face-processing system. *Science* (80- )  
938 [Internet]. 2010 Nov [cited 2010 Nov 5];330(6005):845–51. Available from:  
939 <http://www.sciencemag.org/cgi/doi/10.1126/science.1194908>
- 940 37. Hasselmo M, Rolls E, Baylis G, Nalwa V. Object-centered encoding by face-  
941 selective neurons in the cortex in the superior temporal sulcus of the monkey.  
942 *Exp Brain Res*. 1989;75:417–29.
- 943 38. Wachsmuth E, Oram M, Perrett DI. Recognition of objects and their component  
944 parts: Responses of single units in the temporal cortex of the macaque. *Cereb*  
945 *Cortex*. 1994;4:509–22.
- 946 39. Perrett DI, Rolls E, Caan W. Visual neurones responsive to faces in the monkey  
947 temporal cortex. *Exp Brain Res*. 1982;47:329–42.
- 948 40. Ramirez FM, Cichy RM, Allefeld C, Haynes J-D. The neural code for face  
949 orientation in the human fusiform face area. *J Neurosci*. 2014;34:12155–67.
- 950 41. Carlin JD. Decoding Face Exemplars from fMRI Responses: What Works, What  
951 Doesn't? *J Neurosci*. 2015;35(25):9252–4.
- 952 42. Kriegeskorte N, Diedrichsen J. Inferring brain-computational mechanisms with  
953 models of activity measurements. *Philos Trans R Soc B Biol Sci*. 2016;1–19.
- 954 43. Mattavelli G, Andrews TJ, Asghar AUR, Towler JR, Young AW. Response of face-  
955 selective brain regions to trustworthiness and gender of faces. *Neuropsychologia*  
956 [Internet]. Elsevier; 2012 May 30 [cited 2012 Jul 17];50(9):2205–11. Available  
957 from: <http://www.ncbi.nlm.nih.gov/pubmed/22659107>
- 958 44. Hara Y, Pestilli F, Gardner JL. Differing effects of attention in single-units and  
959 populations are well predicted by heterogeneous tuning and the normalization  
960 model of attention. *Front Comput ...* [Internet]. 2014 [cited 2014 Feb 28];8:1–13.

- 961 Available from:  
962 <http://www.frontiersin.org/Journal/10.3389/fncom.2014.00012/abstract>
- 963 45. Kriegeskorte N, Bandettini PA, Cusack R. How does an fMRI voxel sample the  
964 neuronal activity pattern: Compact-kernel or complex-spatiotemporal filter?  
965 *Neuroimage*. 2009;49(3):1965–76.
- 966 46. Khaligh-Razavi S-M, Henriksson L, Kay K, Kriegeskorte N. Fixed versus mixed  
967 RSA : Explaining visual representations by fixed and mixed feature sets from  
968 shallow and deep computational models. *BiorXiv*. 2016;1–32.
- 969 47. Khaligh-Razavi S-M, Kriegeskorte N. Deep Supervised, but Not Unsupervised,  
970 Models May Explain IT Cortical Representation. *PLoS Comput Biol*.  
971 2014;10(November):1–29.
- 972 48. Jozwik KM, Kriegeskorte N, Mur M. Visual features as stepping stones toward  
973 semantics: Explaining object similarity in IT and perception with non-negative  
974 least squares. *Neuropsychologia* [Internet]. Elsevier; 2016;83:201–26. Available  
975 from: <http://dx.doi.org/10.1016/j.neuropsychologia.2015.10.023>
- 976 49. Carlin JD, Kriegeskorte N. Ramp coding with population averaging predicts  
977 human cortical face-space representations and perception [Internet]. *BiorXiv*.  
978 2015 Oct. Available from: <http://biorxiv.org/lookup/doi/10.1101/029603>
- 979 50. Cusack R, Vicente-Grabovetsky A, Mitchell DJ, Wild CJ, Auer T, Linke AC, et al.  
980 Automatic analysis (aa): efficient neuroimaging workflows and parallel  
981 processing using Matlab and XML. *Front Neuroinform* [Internet].  
982 2014;8(January):90. Available from:  
983 <http://journal.frontiersin.org/article/10.3389/fninf.2014.00090/abstract>
- 984 51. Henson RNA. Analysis of fMRI timeseries: Linear time-invariant models, event-  
985 related fMRI and optimal experimental design. In: Frackowiak RSJ, Friston KJ,  
986 Frith CD, Dolan RJ, Price CJ, editors. *Human Brain Function*. New York: Academic  
987 Press; 2003. p. 793–822.
- 988 52. Burton AM, Vokey JR. The face-space typicality paradox: Understanding the face-  
989 space metaphor. *Q J Exp Psychol* [Internet]. 1998 [cited 2012 May 31];3:475–83.  
990 Available from: <http://www.tandfonline.com/doi/abs/10.1080/713755768>
- 991 53. Aguirre GK, Mattar MG, Magis-Weinberg L, de Bruijn cycles for neural decoding.  
992 *Neuroimage*. Elsevier Inc.; 2011 Mar 24;56(3):1293–300.
- 993 54. van der Kouwe a. JW, Benner T, Salat DH, Fischl B. Brain morphometry with  
994 multiecho MPRAGE. *Neuroimage*. 2008;40(2):559–69.
- 995 55. Manjón J V., Coupé P, Martí-Bonmatí L, Collins DL, Robles M. Adaptive non-local  
996 means denoising of MR images with spatially varying noise levels. *J Magn Reson*  
997 *Imaging*. 2010;31(1):192–203.
- 998 56. Nili H, Wingfield C, Walther A, Su L, Marslen-Wilson W, Kriegeskorte N. A toolbox  
999 for representational similarity analysis. *PLoS Comput Biol*. 2014;10:e1003553.
- 1000 57. Misaki M, Kim Y, Bandettini PA, Kriegeskorte N. Comparison of multivariate  
1001 classifiers and response normalizations for pattern-information fMRI.  
1002 *Neuroimage* [Internet]. 2010 May [cited 2010 Aug 2];53:103–18. Available from:  
1003 <http://dx.doi.org/10.1016/j.neuroimage.2010.05.051>
- 1004 58. Nadeau C, Bengio Y. Inference for the generalization error. *Mach Learn*.  
1005 2003;52(3):239–81.
- 1006 59. Bengio Y, Grandvalet Y. No Unbiased Estimator of the Variance of K-Fold Cross-  
1007 Validation. *J Mach Learn Res* [Internet]. 2004;5:1089–105. Available from:  
1008 <http://www.ncbi.nlm.nih.gov/pubmed/12646250>

1009

1010 **Supporting information**

**Figure S1**

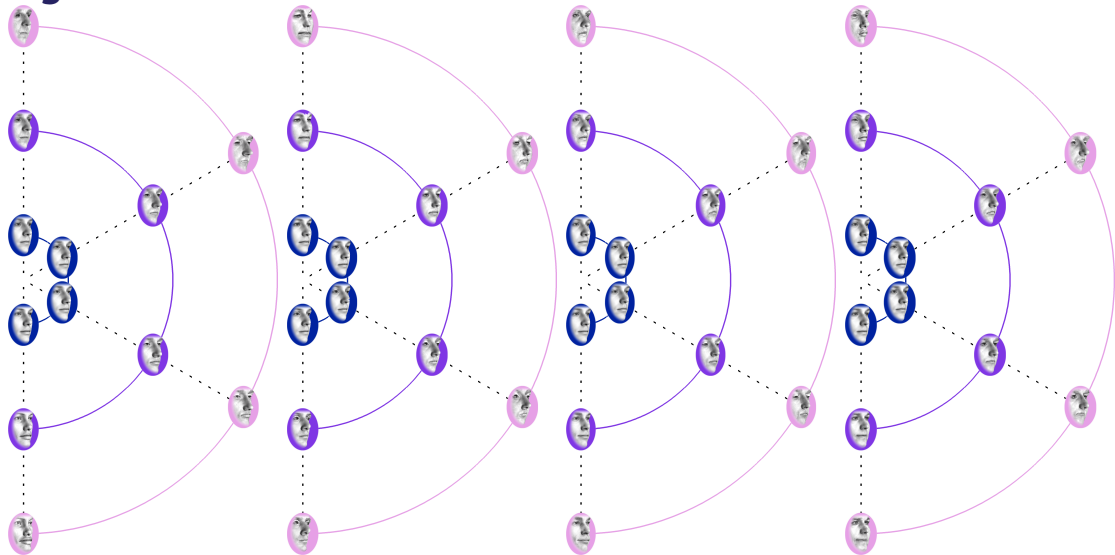

1012 *S1 Figure.* Example stimulus sets for 4 participants. Each stimulus set shares the  
1013 same underlying distance matrix in the reference PCA space, while the randomization of  
1014 the orientation of the plane on which the faces are sampled ensures that each set is  
1015 visually distinct.



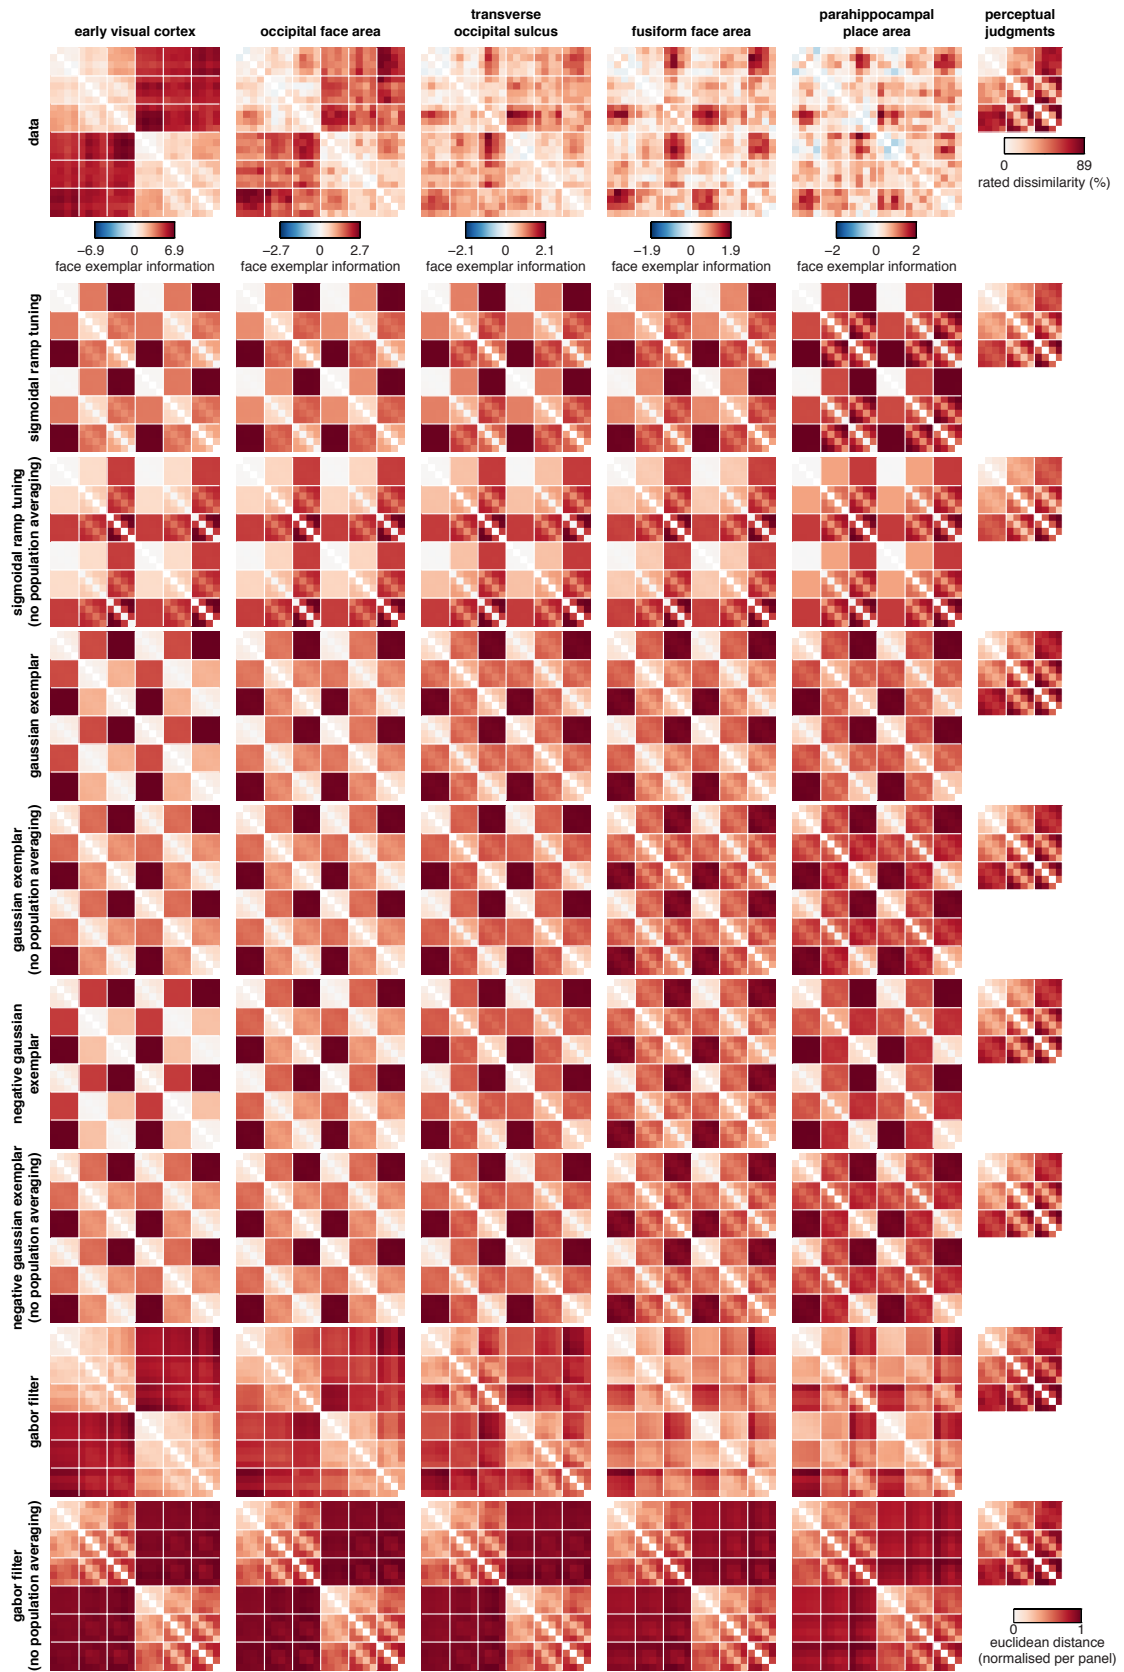

1016

1017 *S2 Figure*. Group-average distance matrices from additional regions of interest and  
 1018 best-fitting model predictions from each model considered in the main manuscript  
 1019 (Figure 5).

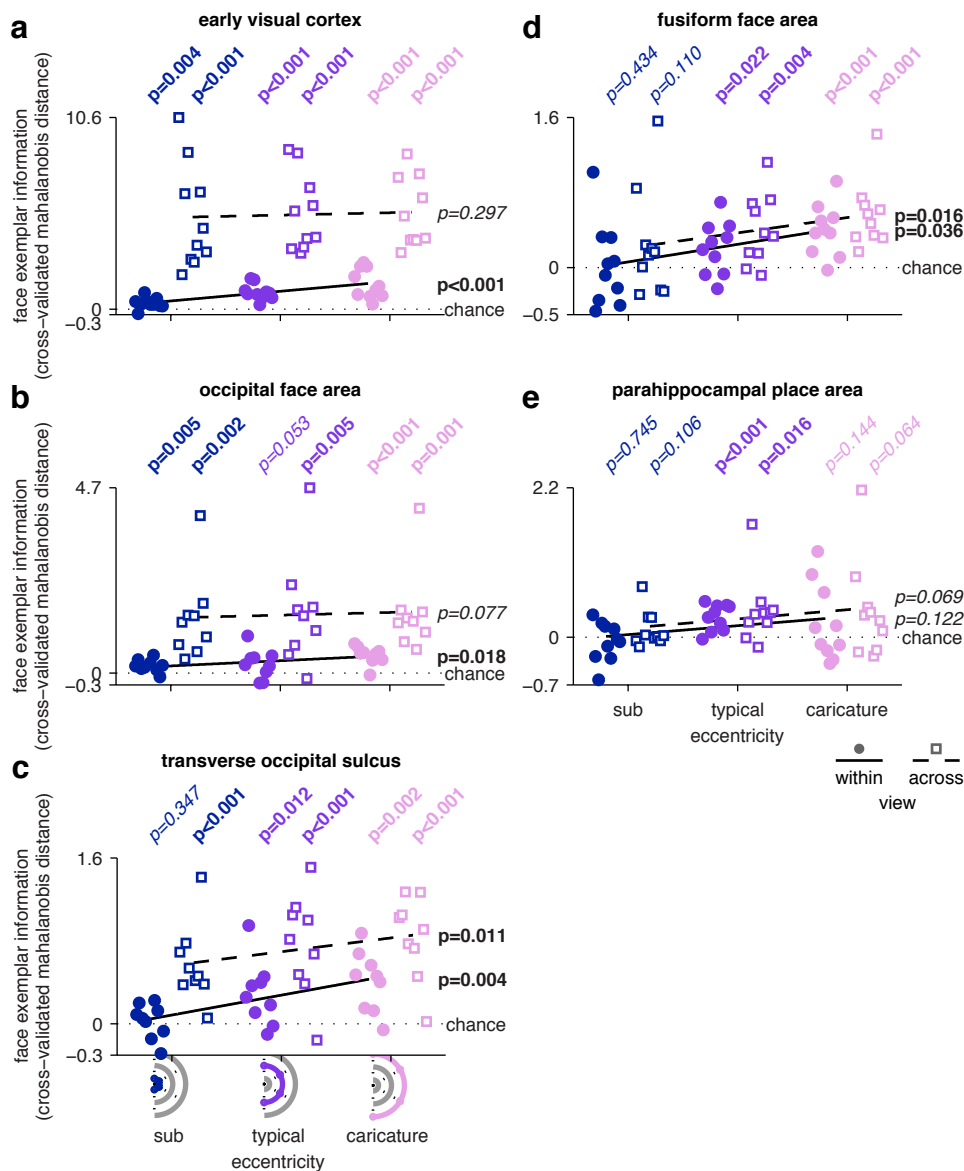

1020

1021 *S3 Figure*. Cortical direction discriminability as a function of eccentricity level. Each  
 1022 point reflects the mean performance for all directions at a given eccentricity level (4x4  
 1023 block diagonals in Figure 1) for a single participant. Small random offsets have been  
 1024 added to each x coordinate for illustrative purposes, and a line shows the least-squares  
 1025 fit. Performance is plotted separately for distances within viewpoint (round markers,

1026 solid line, left offset) and across viewpoint (square markers, dashed line, right offset). All  
1027 plotted p values are obtained through group analysis of single-participant estimates.  
1028 Within viewpoint, cortical discrimination performance increases with eccentricity level  
1029 in all regions except the parahippocampal place area (e). Across viewpoint, statistically  
1030 significant effects are observed in the ventral temporal fusiform face area in the lateral  
1031 temporal transverse occipital sulcus, but not in occipital areas (early visual cortex,  
1032 occipital face area).

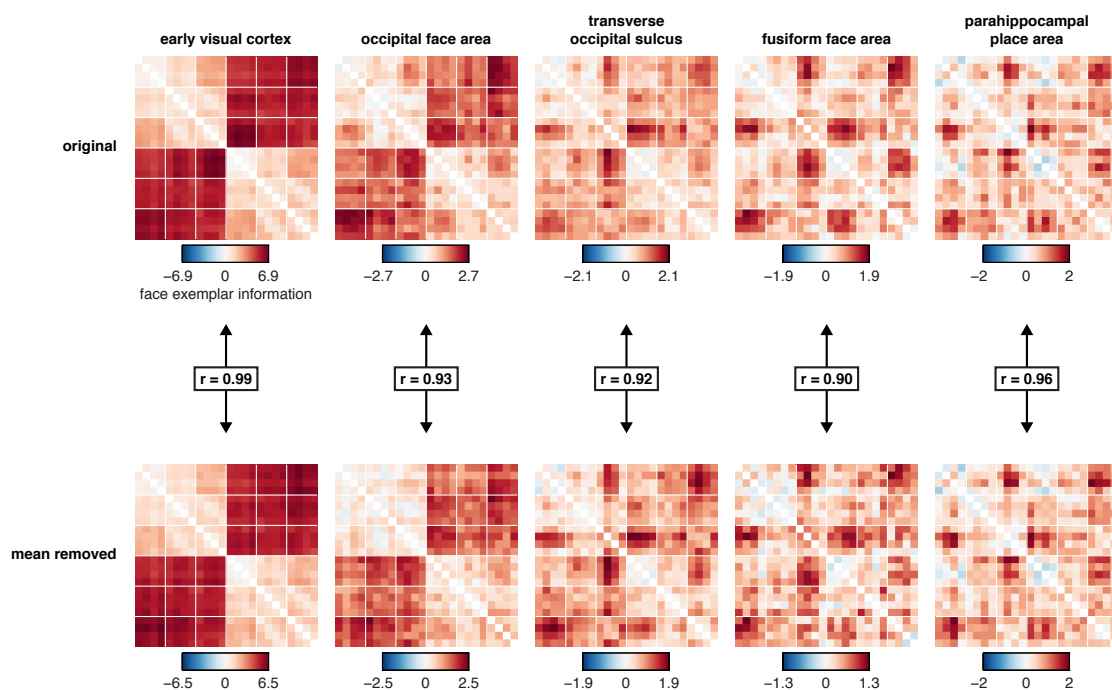

1034 *S4 Figure.* Effect of region-mean removal on cortical face spaces. The top row shows  
1035 original distance matrices, while the bottom row shows distance matrices after  
1036 removing additive and multiplicative mean pattern effects (Experimental Procedures).  
1037 The cited Pearson correlation coefficients are calculated at the group-average level.

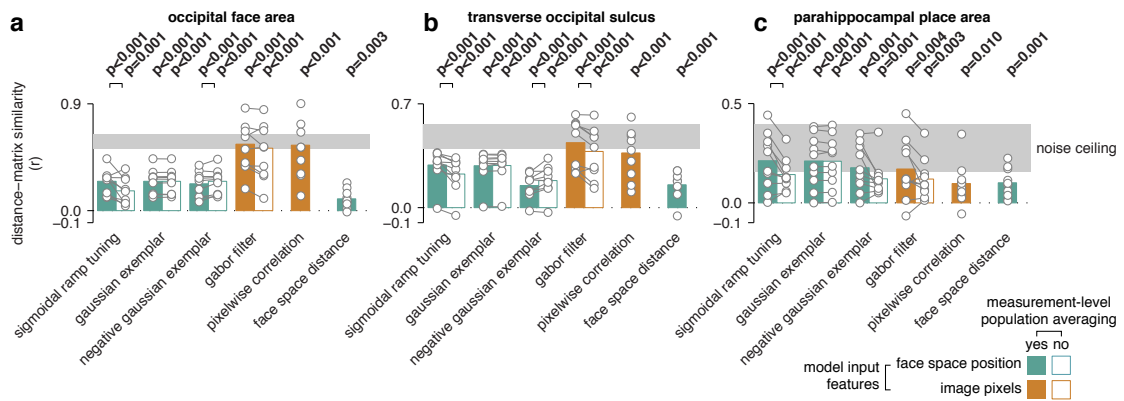

1038

1039 *S5 Figure.* Cross-validated distance-matrix generalization performance for

1040 additional cortical regions of interest. Plotted as Figure 5 in main text.

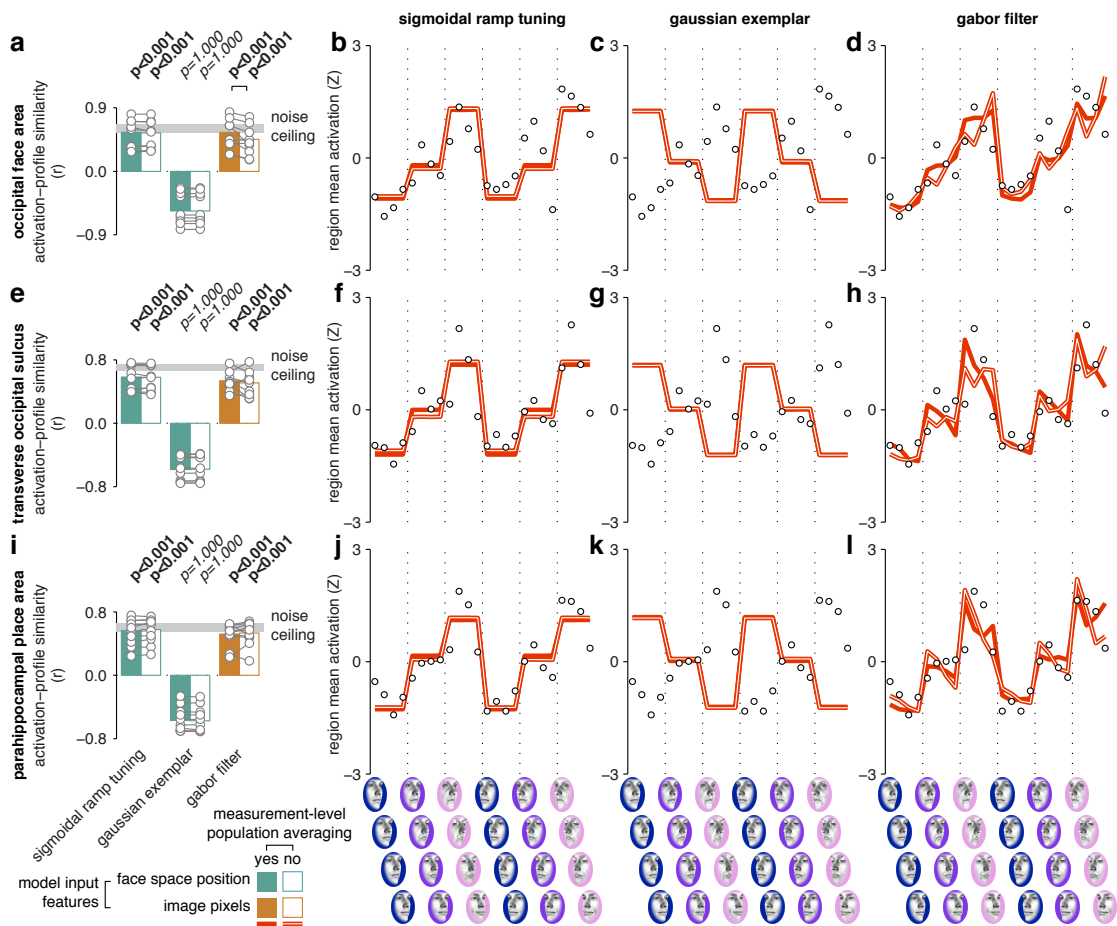

1041

1042 *S6 Figure.* Cross-validated activation-profile generalization performance for

1043 additional cortical regions of interest. Plotted as in Figure 6 in main text.

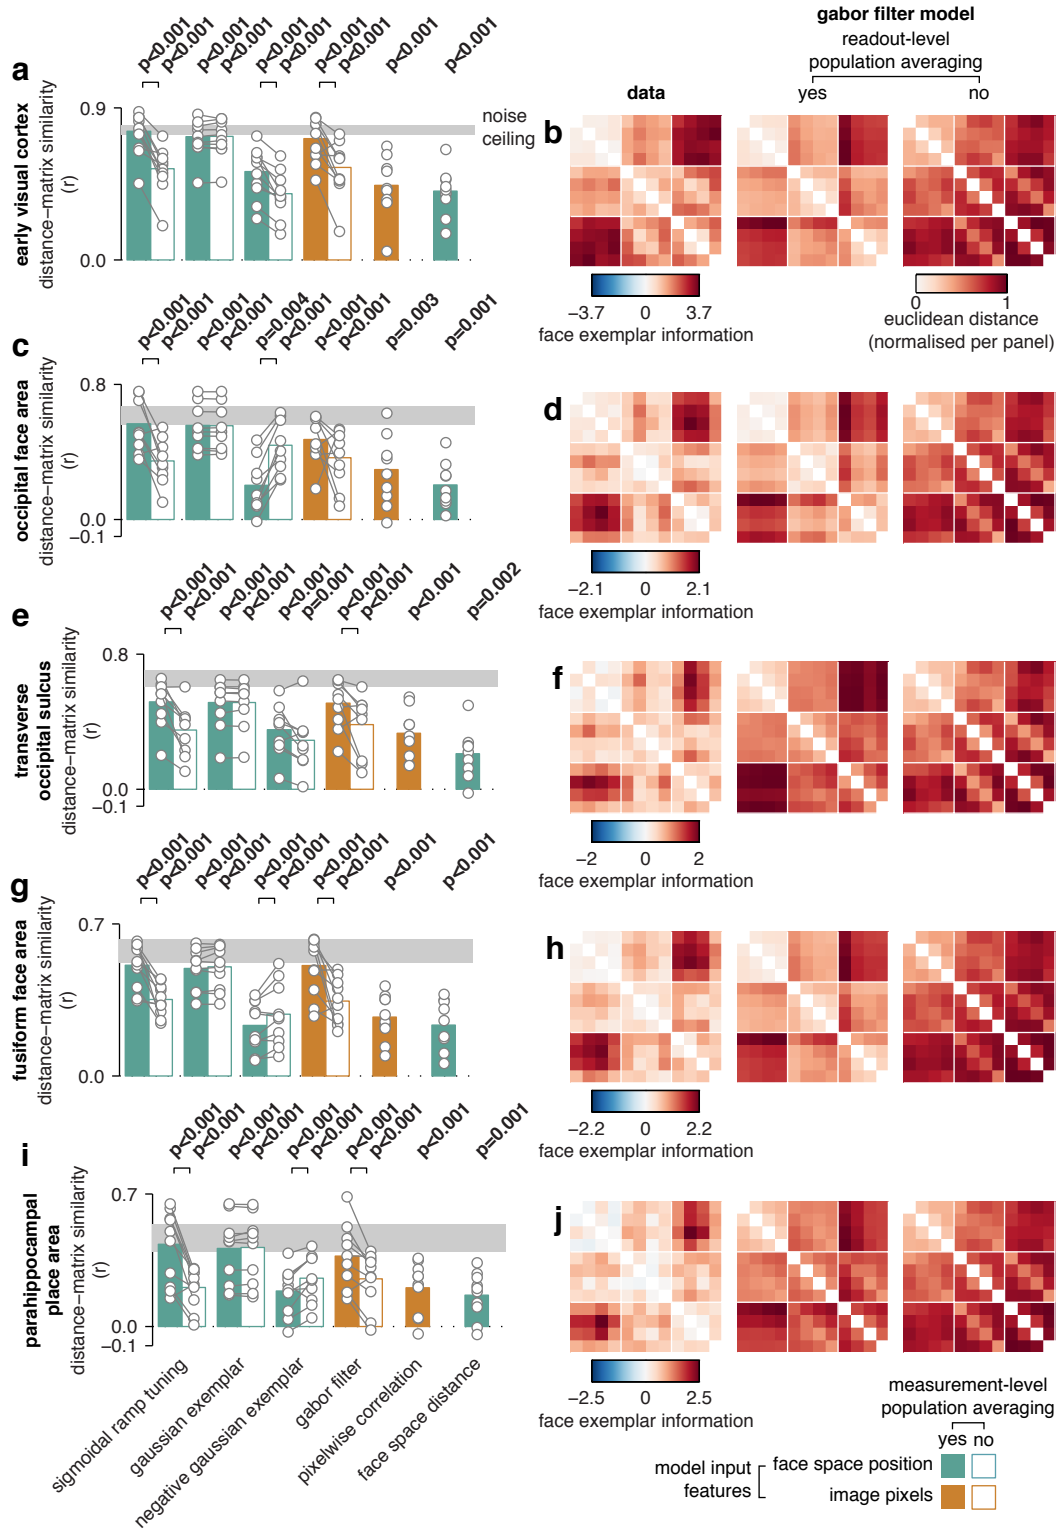

1044

1045 *S7 Figure.* Cross-validated distance-matrix similarity, data distance matrices and  
 1046 best-fitting predicted matrices for an analysis where the two viewpoints have been  
 1047 collapsed into a single set of 12 conditions. Plotted as in Figures 1 and 5 in main text.

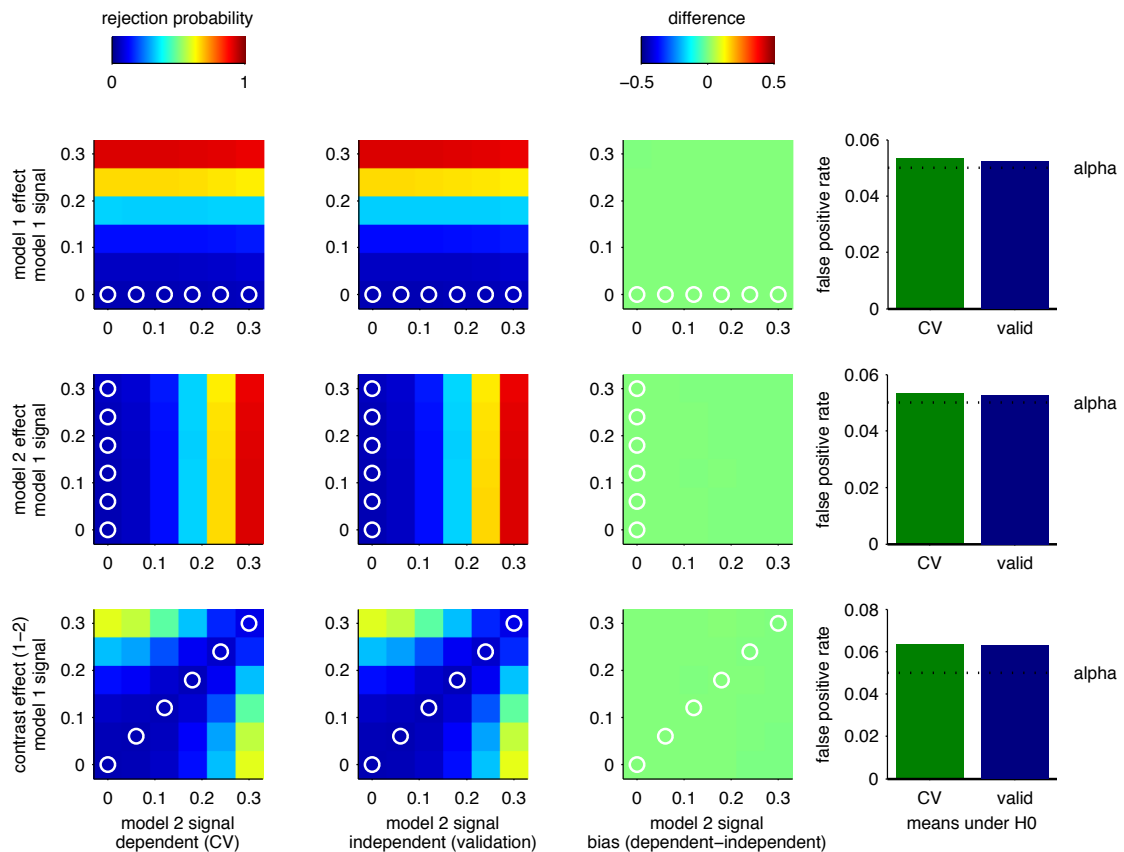

1048

1049 *S8 Figure.* Rejection probability simulation. We simulated out-of-sample  
 1050 generalization performance for two arbitrary models, using methods that closely  
 1051 matched the ones described in this manuscript (for details, see S1 Code). We estimated  
 1052 potential bias by comparing cross-validated generalization performance (panels in  
 1053 leftmost column) with generalization to a withheld validation set (left column,  
 1054 subtraction in right column). The probability of rejecting the null hypothesis ( $p < 0.05$ , T  
 1055 test) over 100000 simulations is plotted for tests of either model against zero (one-  
 1056 tailed test, first two rows of panels), and of zero difference between the models'  
 1057 generalization performance (two-tailed test, bottom row). Each color-mapped image  
 1058 shows the rejection probability as a function of signal level for model 1 (vertical axis)  
 1059 and model 2 (horizontal axis). The null hypothesis case is highlighted with white circles.  
 1060 The bars in the rightmost panel summarize the mean rejection probabilities (ie, false  
 1061 positives) for each of these null cases.

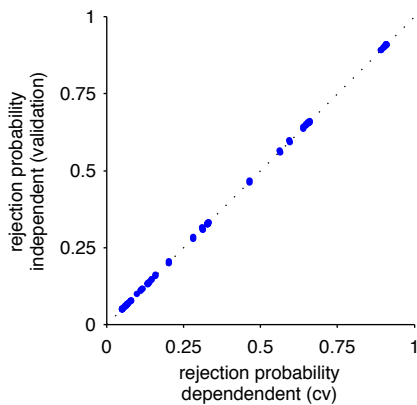

1062

1063 *S9 Figure.* Summary plot of the data in Figure S8. Each point represents the mean  
1064 rejection probability for a unique set of simulation parameters (values in color-mapped  
1065 images in S8 Figure). It can be seen that there is a close to unit relationship between  
1066 rejection probability in the dependent, cross-validated case (vertical axis) and the  
1067 independent, validation case (horizontal axis).

1068 *S1 Code.* Code to reproduce S8 Figure and S9 Figure. Requires Matlab R2013a.

1069 *S1 Table.* Descriptive and inferential statistics for the distance-matrix correlation  
1070 between the face-space models the perceptual and cortical face spaces. We report the  
1071 group-average correlation coefficient (mean\_r), the group-average Z-transformed  
1072 correlation (mean\_zr), standard error for the Z-transformed correlation (sterr\_zr), one-  
1073 tailed p values for the Z-transformed correlation (ppara\_zr) and sample sizes (n).  
1074 Related to Figure 5.

1075 *S2 Table.* Analysis of variance on parameter estimates from multiple regression RSA  
1076 model, with the factors metric (eccentricity, direction), viewpoint (within, across), and a  
1077 two-way interaction term. For details, see main text. Related to Figure 2.

1078 *S3 Table.* Descriptive and inferential statistics for the analysis of direction  
1079 discriminability as a function of eccentricity level. Mean, standard error (sterr), one-

1080 tailed p values ( $p$ ) and sample sizes ( $n$ ) are included on separate rows. See also S3  
1081 Figure.

1082 *S4 Table*. Two-tailed parametric p values for all pairwise comparisons between  
1083 model distance-matrix generalization performances (S1 Table). Related to Figure 5.

1084 *S5 Table*. Descriptive and inferential statistics for activation-profile similarity  
1085 analysis. See S1 Table for an account of what the row labels represent. Related to Figure  
1086 6.

1087 *S6 Table*. Two-tailed parametric p values for all pairwise comparisons between  
1088 activation-profile model fits (S5 Table). Related to Figure 6.

1089 *S7 Table*. Descriptive and inferential statistics for collapsed-view distance-matrix  
1090 generalization performances. See S1 Table for an account of what the row labels  
1091 represent. Related to S7 Figure.

1092 *S8 Table*. Two-tailed parametric p values for all pairwise comparisons between  
1093 collapsed-view distance-matrix generalization performances. See S7 Table, S7 Figure.

1094 *S1 Movie*. Cropped screen capture of the perceptual judgment task as it appeared to  
1095 participants during data collection.

1096 *S2 Movie*. Cropped screen capture of the main experiment as it appeared to  
1097 participants during data collection.
